# Supplementary material for: Dietary Contamination with a Neonicotinoid (Clothianidin) Gradient Triggers Specific Dysbiosis Signatures of Microbiota Activity along the Honeybee (Apis mellifera) Digestive Tract
Source: MDPI journal article supplement (doi:10.3390/microorganisms9112283), 2021-11-02

# Dietary contamination with neonicotinoid (Clothianidin) gradient triggers specific dysbiosis signatures of microbiota activity along the honeybee (*Apis mellifera*) digestive tract

## Supplementary information file

Sarah El Khoury <sup>1,2</sup>, Jeff Gauthier <sup>1,2</sup>, Sidki Bouslama <sup>1,2</sup>, Bachar Cheaib <sup>3</sup>, Pierre Giovenazzo <sup>1</sup>, Nicolas Derome <sup>1,2,\*</sup>.

**1** Departement of Biology, Laval University, Québec, QC G1V 0A6, Canada

**2** Institut de Biologie Intégrative et des Systèmes (IBIS), Laval University, Québec, QC G1V 0A6, Canada

**3** Institute of Biodiversity, Animal Health & Comparative Medicine, University of Glasgow G12 8QQ, United Kingdom

## Contents

|                                                                                                                                               |    |
|-----------------------------------------------------------------------------------------------------------------------------------------------|----|
| Table S1 : Information regarding the reads tracking process using <i>dada2</i> and the number of ASVs per sample                              | 4  |
| Table S2: Cox Proportional Hazards model comparisons between the survival of honeybees exposed vs. unexposed to clothianidin for 28 days      | 9  |
| Table S3: Syrup consumption average levels per honeybee between the experimental groups compared to the control group overtime                | 9  |
| Table S4: Syrup consumption average levels per honeybee between the experimental groups compared to the control group at specific time points | 10 |
| Table S5: Mean quantification of the clothianidin levels (ng/mL per bee) with the standard deviation (S.D.) in the honeybee gut               | 10 |
| Table S6 : Total taxonomic distribution of active ASVs in midgut exposed at 0 ppb                                                             | 11 |
| Table S7: Total taxonomic distribution of active ASVs in midgut exposed at 0.1 ppb                                                            | 14 |
| Table S8: Total taxonomic distribution of active ASVs in midgut exposed at 1 ppb                                                              | 16 |
| Table S9: Total taxonomic distribution of active ASVs in midgut exposed at 10 ppb                                                             | 18 |
| Table S10 : Total taxonomic distribution of active ASVs in ileum exposed at 0 ppb                                                             | 20 |
| Table S11 : Total taxonomic distribution of active ASVs in ileum exposed at 0.1 ppb                                                           | 22 |
| Table S12 : Total taxonomic distribution of active ASVs in ileum exposed at 1 ppb                                                             | 25 |

|                                                                                                                                                                                                                                                     |    |
|-----------------------------------------------------------------------------------------------------------------------------------------------------------------------------------------------------------------------------------------------------|----|
| Table S13 : Total taxonomic distribution of active ASVs in ileum exposed at 10 ppb                                                                                                                                                                  | 27 |
| Table S14 : Total taxonomic distribution of active ASVs in rectum exposed at 0 ppb                                                                                                                                                                  | 29 |
| Table S15 : Total taxonomic distribution of active ASVs in rectum exposed at 0.1 ppb                                                                                                                                                                | 31 |
| Table S16 : Total taxonomic distribution of active ASVs in rectum exposed at 1 ppb                                                                                                                                                                  | 33 |
| Table S17 : Total taxonomic distribution of active ASVs in rectum exposed at 10 ppb                                                                                                                                                                 | 35 |
| Table S18 : Network metrics for gut microbiome taxa in midgut exposed to 0 ppb clothianidin                                                                                                                                                         | 37 |
| Table S19 : Network metrics for gut microbiome taxa in midgut exposed to 0.1 ppb clothianidin                                                                                                                                                       | 39 |
| Table S20 : Network metrics for gut microbiome taxa in midgut exposed to 1 ppb clothianidin                                                                                                                                                         | 40 |
| Table S21 : Network metrics for gut microbiome taxa in midgut exposed to 10 ppb clothianidin                                                                                                                                                        | 42 |
| Table S22 : Network metrics for gut microbiome taxa in ileum exposed to 0 ppb clothianidin                                                                                                                                                          | 44 |
| Table S23 : Network metrics for gut microbiome taxa in ileum exposed to 0.1 ppb clothianidin                                                                                                                                                        | 46 |
| Table S24 : Network metrics for gut microbiome taxa in ileum exposed to 1 ppb clothianidin                                                                                                                                                          | 50 |
| Table S25 : Network metrics for gut microbiome taxa in ileum exposed to 10 ppb clothianidin                                                                                                                                                         | 52 |
| Table S26 : Network metrics for gut microbiome taxa in rectum exposed to 0 ppb clothianidin                                                                                                                                                         | 54 |
| Table S27 : Network metrics for gut microbiome taxa in rectum exposed to 0.1 ppb clothianidin                                                                                                                                                       | 57 |
| Table S28 : Network metrics for gut microbiome taxa in rectum exposed to 1 ppb clothianidin                                                                                                                                                         | 58 |
| Table S29 : Network metrics for gut microbiome taxa in rectum exposed to 10 ppb clothianidin                                                                                                                                                        | 60 |
| Table S30 : Number of positive (+) and/or negative (-) interactions at the genus level in the microbial network depending on each honeybee gut section (midgut, ileum and rectum) and clothianidin concentrations (Ctrl (0 ppb), 0.1, 1 and 10 ppb) | 62 |
| Figure S1 : Violin plot of Degree from taxa in midgut microbial networks                                                                                                                                                                            | 63 |
| Figure S2 : Violin plot of Closeness Centrality from taxa in midgut microbial networks                                                                                                                                                              | 63 |
| Figure S3 : Violin plot of Neighborhood Connectivity from taxa in midgut microbial networks                                                                                                                                                         | 65 |
| Figure S4 : Violin plot of Degree from taxa in ileum microbial networks                                                                                                                                                                             | 66 |
| Figure S5 : Violin plot of Closeness Centrality from taxa in ileum microbial networks                                                                                                                                                               | 66 |
| Figure S6 : Violin plot of Neighborhood Connectivity from taxa in ileum microbial networks                                                                                                                                                          | 68 |

|                                                                                             |    |
|---------------------------------------------------------------------------------------------|----|
| Figure S7 : Violin plot of Degree from taxa in rectum microbial networks                    | 69 |
| Figure S8 : Violin plot of Closeness Centrality from taxa in rectum microbial networks      | 70 |
| Figure S9 : Violin plot of Neighborhood Connectivity from taxa in rectum microbial networks | 71 |

**Table S1 : Information regarding the reads tracking process using *dada2* and the number of ASVs per sample**

| <b>Sample Name</b> | <b>Experimental group</b> | <b>Input reads</b> | <b>Filtration step</b> | <b>Dereplication step</b> | <b>Chimera removal</b> | <b>Number of ASVs</b> |
|--------------------|---------------------------|--------------------|------------------------|---------------------------|------------------------|-----------------------|
| 1-1A               | Control                   | 33613              | 21532                  | 21464                     | 18325                  | 615                   |
| 1-1V               | Control                   | 25563              | 15537                  | 15486                     | 13298                  | 497                   |
| 1-1X               | Control                   | 26019              | 14838                  | 14815                     | 13229                  | 326                   |
| 1-2A               | Control                   | 19322              | 6228                   | 6108                      | 5674                   | 270                   |
| 1-2V               | Control                   | 41578              | 20508                  | 20459                     | 17929                  | 197                   |
| 1-2X               | Control                   | 18821              | 11514                  | 11480                     | 10507                  | 252                   |
| 2-1A               | Control                   | 21870              | 13824                  | 13764                     | 11045                  | 581                   |
| 2-1V               | Control                   | 29357              | 17716                  | 17631                     | 14891                  | 623                   |
| 2-1X               | Control                   | 24504              | 11738                  | 11708                     | 9616                   | 399                   |
| 2-2A               | Control                   | 25328              | 16046                  | 15951                     | 14558                  | 575                   |
| 2-2V               | Control                   | 26700              | 11595                  | 11547                     | 9540                   | 578                   |
| 2-2X               | Control                   | 22684              | 11957                  | 11916                     | 10189                  | 702                   |
| 3-1A               | Control                   | 27932              | 14444                  | 14409                     | 11895                  | 480                   |
| 3-1V               | Control                   | 27825              | 18792                  | 18753                     | 16161                  | 402                   |
| 3-1X               | Control                   | 25342              | 16878                  | 16811                     | 13388                  | 726                   |
| 3-2A               | Control                   | 23429              | 15223                  | 15134                     | 10520                  | 808                   |
| 3-2V               | Control                   | 20283              | 6707                   | 6662                      | 5136                   | 527                   |
| 3-2X               | Control                   | 26392              | 14378                  | 14300                     | 10965                  | 832                   |
| 4-1A               | Control                   | 22348              | 14183                  | 14111                     | 10820                  | 849                   |
| 4-1V               | Control                   | 15                 | 5                      | 2                         | 2                      | 2                     |
| 4-1X               | Control                   | 24007              | 12648                  | 12604                     | 11141                  | 499                   |
| 4-2A               | Control                   | 23432              | 14679                  | 14625                     | 11928                  | 753                   |
| 4-2V               | Control                   | 21944              | 6905                   | 6866                      | 5312                   | 560                   |
| 4-2X               | Control                   | 28505              | 9743                   | 9702                      | 8292                   | 559                   |

|      |                  |       |       |       |       |     |
|------|------------------|-------|-------|-------|-------|-----|
| 5-1A | Control          | 25893 | 14671 | 14621 | 11619 | 746 |
| 5-1V | Control          | 35263 | 10951 | 10909 | 9718  | 383 |
| 5-1X | Control          | 45860 | 18083 | 18025 | 16607 | 400 |
| 5-2A | Control          | 22718 | 14215 | 14140 | 10731 | 919 |
| 5-2V | Control          | 28764 | 13177 | 13127 | 10221 | 401 |
| 5-2X | Control          | 20123 | 10143 | 10077 | 8106  | 486 |
| 6-1A | Clothianidin_0.1 | 27584 | 18413 | 18320 | 15116 | 796 |
| 6-1V | Clothianidin_0.1 | 37584 | 14145 | 14084 | 11401 | 781 |
| 6-1X | Clothianidin_0.1 | 39917 | 16315 | 16238 | 13145 | 718 |
| 6-2A | Clothianidin_0.1 | 16233 | 7996  | 7941  | 7052  | 436 |
| 6-2V | Clothianidin_0.1 | 32763 | 14725 | 14588 | 11507 | 767 |
| 6-2X | Clothianidin_0.1 | 26553 | 12548 | 12436 | 10746 | 574 |
| 7-1A | Clothianidin_0.1 | 23238 | 13248 | 13187 | 10411 | 765 |
| 7-1V | Clothianidin_0.1 | 10581 | 6855  | 6832  | 5529  | 483 |
| 7-1X | Clothianidin_0.1 | 20639 | 11033 | 10957 | 7994  | 775 |
| 7-2A | Clothianidin_0.1 | 24471 | 13888 | 13845 | 10415 | 533 |
| 7-2V | Clothianidin_0.1 | 26217 | 17021 | 16944 | 13935 | 704 |
| 7-2X | Clothianidin_0.1 | 39759 | 18530 | 18394 | 13410 | 929 |
| 8-1A | Clothianidin_0.1 | 29541 | 19188 | 19092 | 16497 | 531 |
| 8-1V | Clothianidin_0.1 | 22913 | 14000 | 13920 | 11699 | 665 |

|       |                      |       |       |       |       |      |
|-------|----------------------|-------|-------|-------|-------|------|
| 8-1X  | Clothianidin_0.<br>1 | 22604 | 5054  | 5038  | 4377  | 352  |
| 8-2A  | Clothianidin_0.<br>1 | 28043 | 12532 | 12441 | 9078  | 780  |
| 8-2V  | Clothianidin_0.<br>1 | 22618 | 8179  | 8128  | 5578  | 648  |
| 8-2X  | Clothianidin_0.<br>1 | 26242 | 11590 | 11539 | 10032 | 434  |
| 9-1A  | Clothianidin_0.<br>1 | 30002 | 19123 | 19045 | 15665 | 616  |
| 9-1V  | Clothianidin_0.<br>1 | 31172 | 12871 | 12760 | 10189 | 830  |
| 9-1X  | Clothianidin_0.<br>1 | 24606 | 13738 | 13640 | 11342 | 805  |
| 9-2A  | Clothianidin_0.<br>1 | 22372 | 14186 | 14081 | 10216 | 853  |
| 9-2V  | Clothianidin_0.<br>1 | 24507 | 11185 | 11131 | 9281  | 693  |
| 9-2X  | Clothianidin_0.<br>1 | 27768 | 16513 | 16422 | 12872 | 827  |
| 10-1A | Clothianidin_0.<br>1 | 20909 | 13211 | 13122 | 9341  | 816  |
| 10-1V | Clothianidin_0.<br>1 | 34691 | 14555 | 14502 | 11965 | 539  |
| 10-1X | Clothianidin_0.<br>1 | 34273 | 11859 | 11733 | 10087 | 593  |
| 10-2A | Clothianidin_0.<br>1 | 21256 | 12227 | 12148 | 9216  | 640  |
| 10-2V | Clothianidin_0.<br>1 | 20466 | 8383  | 8342  | 5872  | 675  |
| 10-2X | Clothianidin_0.<br>1 | 28865 | 13911 | 13856 | 11737 | 752  |
| 11-1A | Clothianidin_1       | 41975 | 23960 | 23802 | 17786 | 1093 |
| 11-1V | Clothianidin_1       | 24817 | 9966  | 9908  | 7525  | 786  |
| 11-1X | Clothianidin_1       | 30467 | 14297 | 14210 | 11164 | 754  |

|       |                |       |       |       |       |      |
|-------|----------------|-------|-------|-------|-------|------|
| 11-2A | Clothianidin_1 | 32112 | 18671 | 18540 | 13215 | 991  |
| 11-2V | Clothianidin_1 | 38629 | 20572 | 20452 | 15045 | 1043 |
| 11-2X | Clothianidin_1 | 34542 | 17916 | 17829 | 14421 | 863  |
| 12-1A | Clothianidin_1 | 21659 | 13446 | 13354 | 8636  | 881  |
| 12-1V | Clothianidin_1 | 38808 | 12745 | 12671 | 10170 | 676  |
| 12-1X | Clothianidin_1 | 33594 | 16764 | 16590 | 12547 | 811  |
| 12-2A | Clothianidin_1 | 18249 | 11080 | 11026 | 8559  | 785  |
| 12-2V | Clothianidin_1 | 23170 | 11395 | 11337 | 7446  | 714  |
| 12-2X | Clothianidin_1 | 25247 | 11731 | 11664 | 10085 | 500  |
| 13-1A | Clothianidin_1 | 15651 | 9447  | 9393  | 6961  | 799  |
| 13-1V | Clothianidin_1 | 23720 | 10964 | 10921 | 8437  | 681  |
| 13-1X | Clothianidin_1 | 15282 | 8049  | 8007  | 6673  | 494  |
| 13-2A | Clothianidin_1 | 17717 | 12175 | 12103 | 9244  | 704  |
| 13-2V | Clothianidin_1 | 18047 | 10469 | 10424 | 8151  | 635  |
| 13-2X | Clothianidin_1 | 17316 | 9906  | 9859  | 8609  | 528  |
| 14-1A | Clothianidin_1 | 28221 | 17378 | 17288 | 13924 | 575  |
| 14-1V | Clothianidin_1 | 21136 | 10562 | 10514 | 8348  | 455  |
| 14-1X | Clothianidin_1 | 21994 | 9321  | 9256  | 7589  | 418  |
| 14-2A | Clothianidin_1 | 15190 | 9606  | 9538  | 7173  | 493  |
| 14-2V | Clothianidin_1 | 24423 | 13912 | 13814 | 11097 | 504  |
| 14-2X | Clothianidin_1 | 17460 | 8017  | 7973  | 6846  | 354  |
| 15-1A | Clothianidin_1 | 10945 | 6539  | 6518  | 5485  | 395  |
| 15-1V | Clothianidin_1 | 21205 | 10765 | 10695 | 7798  | 587  |
| 15-1X | Clothianidin_1 | 21505 | 10931 | 10866 | 8714  | 518  |
| 15-2A | Clothianidin_1 | 28260 | 17115 | 16975 | 12212 | 902  |
| 15-2V | Clothianidin_1 | 22502 | 12827 | 12774 | 10780 | 515  |
| 15-2X | Clothianidin_1 | 27472 | 15506 | 15435 | 12643 | 690  |

|       |                 |       |       |       |       |      |
|-------|-----------------|-------|-------|-------|-------|------|
| 16-1A | Clothianidin_10 | 16004 | 10573 | 10490 | 7204  | 719  |
| 16-1V | Clothianidin_10 | 19102 | 10672 | 10596 | 8107  | 632  |
| 16-1X | Clothianidin_10 | 18991 | 11496 | 11439 | 9227  | 645  |
| 16-2A | Clothianidin_10 | 17387 | 11090 | 11023 | 8658  | 604  |
| 16-2V | Clothianidin_10 | 21864 | 10631 | 10568 | 8483  | 589  |
| 16-2X | Clothianidin_10 | 26506 | 11667 | 11595 | 9095  | 684  |
| 17-1A | Clothianidin_10 | 33351 | 18797 | 18697 | 13507 | 907  |
| 17-1V | Clothianidin_10 | 38559 | 22461 | 22316 | 16346 | 1071 |
| 17-1X | Clothianidin_10 | 26032 | 11471 | 11380 | 8108  | 875  |
| 17-2A | Clothianidin_10 | 13990 | 8648  | 8596  | 6033  | 761  |
| 17-2V | Clothianidin_10 | 35580 | 15248 | 15128 | 10299 | 776  |
| 17-2X | Clothianidin_10 | 95943 | 26069 | 25890 | 18959 | 1000 |
| 18-1A | Clothianidin_10 | 27329 | 17448 | 17342 | 14320 | 658  |
| 18-1V | Clothianidin_10 | 7857  | 4670  | 4638  | 3276  | 601  |
| 18-1X | Clothianidin_10 | 25536 | 14914 | 14837 | 10498 | 983  |
| 18-2A | Clothianidin_10 | 21676 | 10783 | 10738 | 8449  | 665  |
| 18-2V | Clothianidin_10 | 27071 | 14799 | 14661 | 9257  | 1089 |
| 18-2X | Clothianidin_10 | 33271 | 13416 | 13335 | 10560 | 743  |
| 19-1A | Clothianidin_10 | 31118 | 14356 | 14254 | 9577  | 1049 |
| 19-1V | Clothianidin_10 | 23864 | 10494 | 10421 | 7599  | 954  |
| 19-1X | Clothianidin_10 | 27201 | 12648 | 12542 | 8529  | 702  |
| 19-2A | Clothianidin_10 | 11745 | 6436  | 6411  | 5284  | 542  |
| 19-2V | Clothianidin_10 | 26463 | 16568 | 16490 | 12650 | 778  |
| 19-2X | Clothianidin_10 | 26445 | 15723 | 15644 | 12266 | 965  |
| 20-1A | Clothianidin_10 | 18961 | 11581 | 11534 | 8952  | 558  |
| 20-1V | Clothianidin_10 | 32368 | 12709 | 12604 | 9885  | 783  |
| 20-1X | Clothianidin_10 | 49720 | 27283 | 27047 | 19112 | 1188 |



|       |                 |       |       |       |       |     |
|-------|-----------------|-------|-------|-------|-------|-----|
| 20-2A | Clothianidin_10 | 26318 | 14951 | 14873 | 10688 | 819 |
| 20-2V | Clothianidin_10 | 43259 | 19891 | 19761 | 13844 | 958 |
| 20-2X | Clothianidin_10 | 22924 | 12722 | 12638 | 7639  | 973 |

**Table S2: Cox Proportional Hazards model comparisons between the survival of honeybees exposed vs. unexposed to clothianidin for 28 days**

| Days      | 6       | 7       | 14      | 21      | 22      | 25      | 26      | 27      | 28      |
|-----------|---------|---------|---------|---------|---------|---------|---------|---------|---------|
| Ctrl vs:  |         |         |         |         |         |         |         |         |         |
| [0.1 ppb] | < 0.05  | < 0.001 | < 0.001 | < 0.001 | < 0.001 | < 0.001 | < 0.001 | < 0.001 | < 0.001 |
| [1 ppb]   | -       | -       | < 0.05  | -       | < 0.001 | < 0.05  | < 0.05  | -       | 0.001   |
| [10 ppb]  | < 0.001 | -       | -       | -       | -       | -       | -       | < 0.05  | < 0.05  |

Significant

P-values < 0.05 (orange);

P-values = 0.001 (green);

P-values < 0.001 (yellow).

**Table S3: Syrup consumption average levels per honeybee between the experimental groups compared to the control group overtime**

| Treatment | [0.1 ppb] | [1 ppb] | [10 ppb] |
|-----------|-----------|---------|----------|
| Control   | 0.001     | < 0.001 | < 0.001  |

Wilcoxon rank sum test

Significant p-values < 0.05

**Table S4: Syrup consumption average levels per honeybee between the experimental groups compared to the control group at specific time points**

| Days      | 6      | 8 | 11 | 13 | 15 | 25     |   |
|-----------|--------|---|----|----|----|--------|---|
| Ctrl vs:  |        |   |    |    |    |        |   |
| [0.1 ppb] | < 0.05 | - | -  | -  |    | -      | - |
| [1 ppb]   | -      |   |    |    | -  | < 0.05 |   |
| [10 ppb]  | -      | - | -  | -  | -  | -      | - |

Kruskal-Wallis test

Significant p-values < 0.05

**Table S5: Mean quantification of the clothianidin levels (ng/mL per bee) with the standard deviation (S.D.) in the honeybee gut**

| Concentration | Mean<br>(S.D.)<br>Day 7 | R.T. | Mean<br>(S.D.)<br>Day 14 | R.T. | Mean<br>(S.D.)<br>Day 21 | R.T. | Mean<br>(S.D.)<br>Day 28 | R.T. |
|---------------|-------------------------|------|--------------------------|------|--------------------------|------|--------------------------|------|
| Control       | -                       | -    | -                        | -    | -                        | -    | -                        | -    |
| [0.1 ppb]     | 0.013<br>(0.0046)       | 6.26 | 0.009<br>(0.0023)        | 6.24 | 0.008<br>(0.0007)        | 6.12 | 0.006<br>(0.0039)        | 6.20 |
| [1 ppb]       | 0.004<br>(0.0009)       | 6.19 | 0.007<br>(0.0017)        | 6.22 | 0.005<br>(0.0047)        | 6.25 | 0.005<br>(0.0038)        | 6.09 |
| [10 ppb]      | 0.009<br>(0.0007)       | 6.20 | 0.021<br>(0.0033)        | 6.19 | 0.011<br>(0.0061)        | 6.17 | 0.015<br>(0.0063)        | 6.09 |

R.T. (Retention Time)

**Table S6 : Total taxonomic distribution of active ASVs in midgut exposed at 0 ppb**

| <b>ASV Species</b>                            | <b>ASV activity</b> |
|-----------------------------------------------|---------------------|
| <i>[Clostridium] saccharolyticum</i>          | 1                   |
| <i>Achromobacter insolitus</i>                | 23                  |
| <i>Actinomyces johnsonii</i>                  | 6                   |
| <i>Arthrobacter russicus</i>                  | 10                  |
| <i>Bacteroides caccae</i>                     | 1                   |
| <i>Bacteroides plebeius DSM 17135</i>         | 4                   |
| <i>Bartonella apis</i>                        | 6004                |
| <i>Bifidobacterium asteroides</i>             | 31                  |
| <i>Bifidobacterium callitrichos DSM 23973</i> | 1                   |
| <i>Bifidobacterium coryneforme</i>            | 44                  |
| <i>Bombella apis</i>                          | 44                  |
| <i>Bosea vaviloviae</i>                       | 7                   |
| <i>Bradyrhizobium oligotrophicum S58</i>      | 1                   |
| <i>Bradyrhizobium vignae</i>                  | 27                  |
| <i>Brevundimonas albigilva</i>                | 56                  |
| <i>Brevundimonas lenta</i>                    | 12                  |
| <i>Chryseobacterium hispanicum</i>            | 1                   |
| <i>Delftia acidovorans</i>                    | 102                 |
| <i>Dermacoccus profundi</i>                   | 4                   |
| <i>Dialister invisus</i>                      | 6                   |
| <i>Escherichia fergusonii ATCC 35469</i>      | 1                   |

|                                           |       |
|-------------------------------------------|-------|
| <i>Faecalibacterium prausnitzii</i>       | 1     |
| <i>Frischella perrara</i>                 | 25666 |
| <i>Gilliamella apicola</i>                | 4405  |
| <i>Gilliamella bombicola</i>              | 1     |
| <i>Gilliamella intestini</i>              | 17    |
| <i>Intestinibacter bartlettii</i>         | 82    |
| <i>Lachnoclostridium pacaense</i>         | 18    |
| <i>Lactobacillus apis</i>                 | 18339 |
| <i>Lactobacillus helsingborgensis</i>     | 3718  |
| <i>Lactobacillus kimbladii</i>            | 1843  |
| <i>Lactobacillus kullabergensis</i>       | 133   |
| <i>Lactobacillus kunkeei</i>              | 8     |
| <i>Lactobacillus mellifer</i>             | 111   |
| <i>Lactobacillus mellis</i>               | 1077  |
| <i>Lactobacillus melliventris</i>         | 635   |
| <i>Leifsonia shinshuensis</i>             | 1     |
| <i>Lysinibacillus parviboronicapiens</i>  | 8     |
| <i>Moraxella osloensis</i>                | 36    |
| <i>Morganella morganii subsp. sibonii</i> | 6     |
| <i>Oceanobacillus chironomi</i>           | 4     |
| <i>Parasaccharibacter apium</i>           | 270   |
| <i>Pediococcus stilesii</i>               | 180   |
| <i>Pelomonas saccharophila</i>            | 37    |
| <i>Pseudaminobacter manganicus</i>        | 155   |
| <i>Pseudomonas canadensis</i>             | 50    |
| <i>Pseudomonas cerasi</i>                 | 74    |

|                                                     |       |
|-----------------------------------------------------|-------|
| <i>Pseudomonas songnenensis</i>                     | 29    |
| <i>Pseudoxanthomonas jiangsuensis</i>               | 27    |
| <i>Psychrobacter cryohalolentis</i> K5              | 82    |
| <i>Ralstonia pickettii</i>                          | 165   |
| <i>Romboutsia timonensis</i>                        | 519   |
| <i>Roseburia faecis</i>                             | 770   |
| <i>Rothia dentocariosa</i> ATCC 17931               | 162   |
| <i>Shinella fusca</i>                               | 2138  |
| <i>Skermanella aerolata</i>                         | 848   |
| <i>Snodgrassella alvi</i> wkB2                      | 10265 |
| <i>Sphingomonas echinoides</i>                      | 3628  |
| <i>Staphylococcus epidermidis</i>                   | 9005  |
| <i>Streptococcus oralis</i> subsp. <i>dentisani</i> | 6983  |
| <i>Streptococcus salivarius</i>                     | 7593  |
| <i>Unassigned</i>                                   | 10788 |

**Table S7: Total taxonomic distribution of active ASVs in midgut exposed at 0.1 ppb**

| ASV Species                                   | ASV activity |
|-----------------------------------------------|--------------|
| <i>[Clostridium] saccharolyticum</i>          | 1            |
| <i>Bacillus licheniformis</i>                 | 1            |
| <i>Bacillus wiedmannii</i>                    | 2            |
| <i>Bacteroides caccae</i>                     | 2            |
| <i>Bacteroides plebeius</i> DSM 17135         | 1            |
| <i>Bartonella apis</i>                        | 6052         |
| <i>Bifidobacterium asteroides</i>             | 12           |
| <i>Bifidobacterium callitrichos</i> DSM 23973 | 1            |
| <i>Bifidobacterium coryneforme</i>            | 23           |
| <i>Bombella apis</i>                          | 236          |
| <i>Bradyrhizobium oligotrophicum</i> S58      | 4            |
| <i>Bradyrhizobium vignae</i>                  | 4            |
| <i>Dermaococcus profundus</i>                 | 10           |
| <i>Dialister invisus</i>                      | 4            |
| <i>Frischella perrara</i>                     | 9582         |
| <i>Gemmiger formicilis</i>                    | 0            |
| <i>Gilliamella apicola</i>                    | 2772         |
| <i>Intestinibacter bartlettii</i>             | 2            |
| <i>Lachnoclostridium pacaense</i>             | 20           |
| <i>Lactobacillus apis</i>                     | 3492         |
| <i>Lactobacillus helsingborgensis</i>         | 480          |
| <i>Lactobacillus kimbladii</i>                | 89           |
| <i>Lactobacillus kullabergensis</i>           | 19           |

|                                          |       |
|------------------------------------------|-------|
| <i>Lactobacillus kunkeei</i>             | 1     |
| <i>Lactobacillus mellifer</i>            | 42    |
| <i>Lactobacillus mellis</i>              | 185   |
| <i>Lactobacillus melliventris</i>        | 487   |
| <i>Lysinibacillus parviboronicapiens</i> | 10    |
| <i>Methylobacterium populi BJ001</i>     | 1     |
| <i>Oceanobacillus chironomi</i>          | 28    |
| <i>Parasaccharibacter apium</i>          | 1     |
| <i>Pediococcus stilesii</i>              | 1     |
| <i>Pelomonas saccharophila</i>           | 71    |
| <i>Phascolarctobacterium faecium</i>     | 114   |
| <i>Pseudaminobacter manganicus</i>       | 9     |
| <i>Pseudomonas canadensis</i>            | 254   |
| <i>Pseudomonas cerasi</i>                | 114   |
| <i>Pseudomonas songnenensis</i>          | 146   |
| <i>Pseudoxanthomonas jiangsuensis</i>    | 17    |
| <i>Psychrobacter cryohalolentis K5</i>   | 440   |
| <i>Ralstonia insidiosa</i>               | 232   |
| <i>Ralstonia pickettii</i>               | 436   |
| <i>Romboutsia timonensis</i>             | 994   |
| <i>Roseburia faecis</i>                  | 1577  |
| <i>Rothia dentocariosa ATCC 17931</i>    | 171   |
| <i>Shinella fusca</i>                    | 4467  |
| <i>Skermanella aerolata</i>              | 2     |
| <i>Snodgrassella alvi wkb2</i>           | 16055 |
| <i>Sphingomonas echinoides</i>           | 8777  |

|                                              |       |
|----------------------------------------------|-------|
| <i>Staphylococcus epidermidis</i>            | 11709 |
| <i>Streptococcus oralis subsp. dentisani</i> | 9801  |
| <i>Streptococcus salivarius</i>              | 19617 |
| <i>Unassigned</i>                            | 12379 |

**Table S8: Total taxonomic distribution of active ASVs in midgut exposed at 1 ppb**

| <b>ASV Species</b>                            | <b>ASV activity</b> |
|-----------------------------------------------|---------------------|
| <i>Actinomyces johnsonii</i>                  | 3                   |
| <i>Bacillus wiedmannii</i>                    | 2                   |
| <i>Bacteroides caccae</i>                     | 1                   |
| <i>Bacteroides dorei</i>                      | 4                   |
| <i>Bartonella apis</i>                        | 2029                |
| <i>Bifidobacterium asteroides</i>             | 33                  |
| <i>Bifidobacterium callitrichos DSM 23973</i> | 6                   |
| <i>Bifidobacterium coryneforme</i>            | 111                 |
| <i>Blautia wexlerae DSM 19850</i>             | 1                   |
| <i>Bombella apis</i>                          | 118                 |
| <i>Bradyrhizobium oligotrophicum S58</i>      | 8                   |
| <i>Bradyrhizobium vignae</i>                  | 6                   |
| <i>Dermacoccus profundi</i>                   | 6                   |
| <i>Escherichia fergusonii ATCC 35469</i>      | 4                   |
| <i>Faecalibacterium prausnitzii</i>           | 1                   |
| <i>Flavobacterium acidificum</i>              | 15                  |
| <i>Frischella perrara</i>                     | 1931                |
| <i>Gemmiger formicilis</i>                    | 1                   |



|                                          |       |
|------------------------------------------|-------|
| <i>Gilliamella apicola</i>               | 2077  |
| <i>Intestinibacter bartlettii</i>        | 2     |
| <i>Lactobacillus apis</i>                | 10196 |
| <i>Lactobacillus helsingborgensis</i>    | 1562  |
| <i>Lactobacillus kimbladii</i>           | 132   |
| <i>Lactobacillus kullabergensis</i>      | 16    |
| <i>Lactobacillus kunkeei</i>             | 31    |
| <i>Lactobacillus mellifer</i>            | 28    |
| <i>Lactobacillus mellis</i>              | 303   |
| <i>Lactobacillus melliventris</i>        | 209   |
| <i>Leifsonia shinshuensis</i>            | 5     |
| <i>Lysinibacillus parviboronicapiens</i> | 9     |
| <i>Methylobacterium populi BJ001</i>     | 1     |
| <i>Oceanobacillus chironomi</i>          | 3     |
| <i>Parasaccharibacter apium</i>          | 275   |
| <i>Pediococcus stilesii</i>              | 2     |
| <i>Pelomonas saccharophila</i>           | 73    |
| <i>Phascolarctobacterium faecium</i>     | 7     |
| <i>Pseudaminobacter manganicus</i>       | 26    |
| <i>Pseudomonas canadensis</i>            | 180   |
| <i>Pseudomonas cerasi</i>                | 67    |
| <i>Pseudomonas songnenensis</i>          | 30    |
| <i>Pseudoxanthomonas jiangsuensis</i>    | 86    |
| <i>Psychrobacter cryohalolentis K5</i>   | 294   |
| <i>Ralstonia insidiosa</i>               | 369   |
| <i>Ralstonia pickettii</i>               | 322   |

|                                              |       |
|----------------------------------------------|-------|
| <i>Romboutsia timonensis</i>                 | 1226  |
| <i>Roseburia faecis</i>                      | 1137  |
| <i>Rothia dentocariosa ATCC 17931</i>        | 164   |
| <i>Shinella fusca</i>                        | 6860  |
| <i>Skermanella aerolata</i>                  | 6777  |
| <i>Snodgrassella alvi wkb2</i>               | 15599 |
| <i>Sphingomonas echinoides</i>               | 13694 |
| <i>Staphylococcus epidermidis</i>            | 8321  |
| <i>Streptococcus oralis subsp. dentisani</i> | 1493  |
| <i>Streptococcus salivarius</i>              | 23362 |
| <i>Unassigned</i>                            | 13742 |

**Table S9: Total taxonomic distribution of active ASVs in midgut exposed at 10 ppb**

| <b>ASV Species</b>                            | <b>ASV activity</b> |
|-----------------------------------------------|---------------------|
| <i>Achromobacter insolitus</i>                | 4                   |
| <i>Actinomyces johnsonii</i>                  | 1                   |
| <i>Bacillus wiedmannii</i>                    | 54                  |
| <i>Bartonella apis</i>                        | 5560                |
| <i>Bifidobacterium asteroides</i>             | 139                 |
| <i>Bifidobacterium callitrichos DSM 23973</i> | 6                   |
| <i>Bifidobacterium coryneforme</i>            | 138                 |
| <i>Bombella apis</i>                          | 2                   |
| <i>Bradyrhizobium vignae</i>                  | 2                   |
| <i>Delftia acidovorans</i>                    | 5                   |
| <i>Dermacoccus profundi</i>                   | 11                  |

|                                        |       |
|----------------------------------------|-------|
| <i>Faecalibacterium prausnitzii</i>    | 2     |
| <i>Frischella perrara</i>              | 7093  |
| <i>Gilliamella apicola</i>             | 16389 |
| <i>Gilliamella bombicola</i>           | 4     |
| <i>Gilliamella intestini</i>           | 5     |
| <i>Intestinibacter bartlettii</i>      | 2     |
| <i>Lactobacillus apis</i>              | 24330 |
| <i>Lactobacillus helsingborgensis</i>  | 3054  |
| <i>Lactobacillus kimbladii</i>         | 1081  |
| <i>Lactobacillus kullabergensis</i>    | 244   |
| <i>Lactobacillus kunkeei</i>           | 9     |
| <i>Lactobacillus mellifer</i>          | 112   |
| <i>Lactobacillus mellis</i>            | 760   |
| <i>Lactobacillus melliventris</i>      | 1753  |
| <i>Lawsonella clevelandensis</i>       | 4     |
| <i>Leifsonia shinshuensis</i>          | 1     |
| <i>Parasaccharibacter apium</i>        | 1161  |
| <i>Pediococcus stilesii</i>            | 24    |
| <i>Pelomonas saccharophila</i>         | 117   |
| <i>Pseudaminobacter manganicus</i>     | 102   |
| <i>Pseudomonas canadensis</i>          | 95    |
| <i>Pseudomonas cerasi</i>              | 191   |
| <i>Pseudomonas songnenensis</i>        | 22    |
| <i>Pseudoxanthomonas jiangsuensis</i>  | 8     |
| <i>Psychrobacter cryohalolentis K5</i> | 185   |
| <i>Ralstonia insidiosa</i>             | 9     |

|                                              |       |
|----------------------------------------------|-------|
| <i>Ralstonia pickettii</i>                   | 168   |
| <i>Romboutsia timonensis</i>                 | 772   |
| <i>Roseburia faecis</i>                      | 1487  |
| <i>Rothia dentocariosa ATCC 17931</i>        | 1     |
| <i>Shinella fusca</i>                        | 2589  |
| <i>Skermanella aerolata</i>                  | 1159  |
| <i>Snodgrassella alvi wkb2</i>               | 10116 |
| <i>Sphingomonas echinoides</i>               | 3775  |
| <i>Staphylococcus epidermidis</i>            | 9959  |
| <i>Streptococcus oralis subsp. dentisani</i> | 3399  |
| <i>Streptococcus salivarius</i>              | 10126 |
| <i>Unassigned</i>                            | 14842 |

**Table S10 : Total taxonomic distribution of active ASVs in ileum exposed at 0 ppb**

| <b>ASV Species</b>                            | <b>ASV activity</b> |
|-----------------------------------------------|---------------------|
| <i>Achromobacter insolitus</i>                | 3                   |
| <i>Acinetobacter defluvii</i>                 | 2                   |
| <i>Arthrobacter russicus</i>                  | 5                   |
| <i>Bacillus wiedmannii</i>                    | 1                   |
| <i>Bacteroides caccae</i>                     | 3                   |
| <i>Bartonella apis</i>                        | 5211                |
| <i>Bifidobacterium asteroides</i>             | 10                  |
| <i>Bifidobacterium callitrichos DSM 23973</i> | 1                   |
| <i>Bifidobacterium coryneforme</i>            | 48                  |
| <i>Blautia wexlerae DSM 19850</i>             | 21                  |

|                                          |       |
|------------------------------------------|-------|
| <i>Bombella apis</i>                     | 39    |
| <i>Bradyrhizobium vignae</i>             | 4     |
| <i>Brevundimonas albigilva</i>           | 4     |
| <i>Dermacoccus profundus</i>             | 2     |
| <i>Escherichia fergusonii</i> ATCC 35469 | 1     |
| <i>Faecalibacterium prausnitzii</i>      | 3     |
| <i>Frischella perrara</i>                | 23313 |
| <i>Gilliamella apicola</i>               | 5795  |
| <i>Gilliamella bombicola</i>             | 6     |
| <i>Gilliamella intestini</i>             | 3     |
| <i>Lachnoclostridium pacaense</i>        | 4     |
| <i>Lactobacillus apis</i>                | 23973 |
| <i>Lactobacillus helsingborgensis</i>    | 3255  |
| <i>Lactobacillus kimbladii</i>           | 580   |
| <i>Lactobacillus kullabergensis</i>      | 54    |
| <i>Lactobacillus kunkeei</i>             | 3     |
| <i>Lactobacillus mellifer</i>            | 98    |
| <i>Lactobacillus mellis</i>              | 609   |
| <i>Lactobacillus melliventris</i>        | 641   |
| <i>Lactobacillus rogosae</i>             | 1     |
| <i>Lysinibacillus parviboronicapiens</i> | 4     |
| <i>Oceanobacillus chironomi</i>          | 3     |
| <i>Parasaccharibacter apium</i>          | 17    |
| <i>Pediococcus stilesii</i>              | 159   |
| <i>Pelomonas saccharophila</i>           | 21    |
| <i>Pseudaminobacter manganicus</i>       | 1     |

|                                              |       |
|----------------------------------------------|-------|
| <i>Pseudomonas canadensis</i>                | 82    |
| <i>Pseudomonas cerasi</i>                    | 35    |
| <i>Pseudomonas songnenensis</i>              | 71    |
| <i>Pseudoxanthomonas jiangsuensis</i>        | 5     |
| <i>Psychrobacter cryohalolentis K5</i>       | 26    |
| <i>Ralstonia pickettii</i>                   | 428   |
| <i>Romboutsia timonensis</i>                 | 511   |
| <i>Roseburia faecis</i>                      | 437   |
| <i>Rothia dentocariosa ATCC 17931</i>        | 85    |
| <i>Shinella fusca</i>                        | 2336  |
| <i>Skermanella aerolata</i>                  | 235   |
| <i>Snodgrassella alvi wkb2</i>               | 19553 |
| <i>Sphingomonas echinoides</i>               | 8825  |
| <i>Staphylococcus epidermidis</i>            | 4802  |
| <i>Streptococcus oralis subsp. dentisani</i> | 1645  |
| <i>Streptococcus salivarius</i>              | 12975 |
| <i>Unassigned</i>                            | 8837  |

**Table S11 : Total taxonomic distribution of active ASVs in ileum exposed at 0.1 ppb**

| <b>ASV Species</b>             | <b>ASV activity</b> |
|--------------------------------|---------------------|
| <i>Achromobacter insolitus</i> | 3                   |
| <i>Acinetobacter defluvii</i>  | 6                   |
| <i>Actinomyces johnsonii</i>   | 1                   |
| <i>Bacillus wiedmannii</i>     | 14                  |
| <i>Bacteroides caccae</i>      | 2                   |
| <i>Bacteroides dorei</i>       | 2                   |

|                                               |       |
|-----------------------------------------------|-------|
| <i>Bartonella apis</i>                        | 7950  |
| <i>Bifidobacterium asteroides</i>             | 15    |
| <i>Bifidobacterium callitrichos</i> DSM 23973 | 3     |
| <i>Bifidobacterium coryneforme</i>            | 110   |
| <i>Bradyrhizobium oligotrophicum</i> S58      | 1     |
| <i>Bradyrhizobium vignae</i>                  | 10    |
| <i>Brevundimonas albigilva</i>                | 2     |
| <i>Chryseobacterium hispanicum</i>            | 1     |
| <i>Delftia acidovorans</i>                    | 8     |
| <i>Dermacoccus profundi</i>                   | 6     |
| <i>Flavobacterium acidificum</i>              | 7     |
| <i>Frischella perrara</i>                     | 9153  |
| <i>Gilliamella apicola</i>                    | 5041  |
| <i>Gilliamella bombicola</i>                  | 4     |
| <i>Gilliamella intestini</i>                  | 11    |
| <i>Lachnoclostridium pacaense</i>             | 4     |
| <i>Lactobacillus apis</i>                     | 29174 |
| <i>Lactobacillus helsingborgensis</i>         | 4113  |
| <i>Lactobacillus kimbladii</i>                | 446   |
| <i>Lactobacillus kullabergensis</i>           | 80    |
| <i>Lactobacillus mellifer</i>                 | 83    |
| <i>Lactobacillus mellis</i>                   | 311   |
| <i>Lactobacillus melliventris</i>             | 1320  |
| <i>Lawsonella clevelandensis</i>              | 3     |
| <i>Leifsonia shinshuensis</i>                 | 1     |
| <i>Lysinibacillus parviboronicapiens</i>      | 3     |

|                                                     |       |
|-----------------------------------------------------|-------|
| <i>Methylobacterium populi</i> BJ001                | 5     |
| <i>Morganella morganii</i> subsp. <i>sibonii</i>    | 2     |
| <i>Parasaccharibacter apium</i>                     | 1     |
| <i>Pediococcus stilesii</i>                         | 216   |
| <i>Pelomonas saccharophila</i>                      | 23    |
| <i>Phascolarctobacterium faecium</i>                | 122   |
| <i>Pseudaminobacter manganicus</i>                  | 11    |
| <i>Pseudomonas canadensis</i>                       | 95    |
| <i>Pseudomonas cerasi</i>                           | 131   |
| <i>Pseudomonas songnenensis</i>                     | 53    |
| <i>Pseudoxanthomonas jiangsuensis</i>               | 252   |
| <i>Psychrobacter cryohalolentis</i> K5              | 186   |
| <i>Ralstonia insidiosa</i>                          | 252   |
| <i>Ralstonia pickettii</i>                          | 886   |
| <i>Romboutsia timonensis</i>                        | 275   |
| <i>Roseburia faecis</i>                             | 430   |
| <i>Rothia dentocariosa</i> ATCC 17931               | 2316  |
| <i>Shinella fusca</i>                               | 2918  |
| <i>Skermanella aerolata</i>                         | 64    |
| <i>Snodgrassella alvi</i> wkB2                      | 17322 |
| <i>Sphingomonas echinoides</i>                      | 6272  |
| <i>Staphylococcus epidermidis</i>                   | 5320  |
| <i>Streptococcus oralis</i> subsp. <i>dentisani</i> | 2809  |
| <i>Streptococcus salivarius</i>                     | 12297 |
| Unassigned                                          | 9726  |



**Table S12 : Total taxonomic distribution of active ASVs in ileum exposed at 1 ppb**

| ASV Species                                   | ASV activity |
|-----------------------------------------------|--------------|
| <i>[Clostridium] saccharolyticum</i>          | 5            |
| <i>Achromobacter insolitus</i>                | 6            |
| <i>Arthrobacter russicus</i>                  | 1            |
| <i>Bacillus wiedmannii</i>                    | 182          |
| <i>Bacteroides caccae</i>                     | 1            |
| <i>Bacteroides dorei</i>                      | 5            |
| <i>Bartonella apis</i>                        | 4793         |
| <i>Bifidobacterium asteroides</i>             | 22           |
| <i>Bifidobacterium callitrichos DSM 23973</i> | 4            |
| <i>Bifidobacterium coryneforme</i>            | 49           |
| <i>Bradyrhizobium oligotrophicum S58</i>      | 7            |
| <i>Bradyrhizobium vignae</i>                  | 39           |
| <i>Brevundimonas albigilva</i>                | 6            |
| <i>Brevundimonas lenta</i>                    | 9            |
| <i>Chryseobacterium hispanicum</i>            | 6            |
| <i>Delftia acidovorans</i>                    | 10           |
| <i>Dermaococcus profundus</i>                 | 3            |
| <i>Dialister invisus</i>                      | 5            |
| <i>Escherichia fergusonii ATCC 35469</i>      | 4            |
| <i>Flavobacterium acidificum</i>              | 2            |
| <i>Frischella perrara</i>                     | 16368        |
| <i>Gemmiger formicilis</i>                    | 1            |
| <i>Gilliamella apicola</i>                    | 1903         |

|                                            |       |
|--------------------------------------------|-------|
| <i>Gilliamella bombicola</i>               | 1     |
| <i>Lachnoclostridium pacaense</i>          | 5     |
| <i>Lactobacillus apis</i>                  | 15168 |
| <i>Lactobacillus helsingborgensis</i>      | 2745  |
| <i>Lactobacillus kimbladii</i>             | 237   |
| <i>Lactobacillus kullabergensis</i>        | 20    |
| <i>Lactobacillus kunkeei</i>               | 15    |
| <i>Lactobacillus mellifer</i>              | 34    |
| <i>Lactobacillus mellis</i>                | 334   |
| <i>Lactobacillus melliventris</i>          | 611   |
| <i>Lactobacillus rogosae</i>               | 1     |
| <i>Lawsonella clevelandensis</i>           | 2     |
| <i>Lysinibacillus parviboronicapiens</i>   | 2     |
| <i>Methylobacterium populi BJ001</i>       | 8     |
| <i>Morganella morganii subsp. sibonii</i>  | 6     |
| <i>Oceanobacillus chironomi</i>            | 2     |
| <i>Parasaccharibacter apium</i>            | 339   |
| <i>Pediococcus stilesii</i>                | 76    |
| <i>Pelomonas saccharophila</i>             | 11    |
| <i>Phascolarctobacterium faecium</i>       | 16    |
| <i>Phascolarctobacterium succinatutens</i> | 122   |
| <i>Pseudaminobacter manganicus</i>         | 5     |
| <i>Pseudomonas canadensis</i>              | 54    |
| <i>Pseudomonas cerasi</i>                  | 35    |
| <i>Pseudomonas songnenensis</i>            | 20    |
| <i>Pseudoxanthomonas jiangsuensis</i>      | 31    |

|                                                     |       |
|-----------------------------------------------------|-------|
| <i>Psychrobacter cryohalolentis</i> K5              | 95    |
| <i>Ralstonia insidiosa</i>                          | 15    |
| <i>Ralstonia pickettii</i>                          | 150   |
| <i>Romboutsia timonensis</i>                        | 450   |
| <i>Roseburia faecis</i>                             | 626   |
| <i>Shinella fusca</i>                               | 3512  |
| <i>Skermanella aerolata</i>                         | 163   |
| <i>Snodgrassella alvi</i> wkB2                      | 9250  |
| <i>Sphingomonas echinoides</i>                      | 16699 |
| <i>Staphylococcus epidermidis</i>                   | 6428  |
| <i>Streptococcus oralis</i> subsp. <i>dentisani</i> | 499   |
| <i>Streptococcus salivarius</i>                     | 18116 |
| Unassigned                                          | 12014 |

**Table S13 : Total taxonomic distribution of active ASVs in ileum exposed at 10 ppb**

| ASV Species                                   | ASV activity |
|-----------------------------------------------|--------------|
| <i>Bacillus wiedmannii</i>                    | 80           |
| <i>Bacteroides caccae</i>                     | 5            |
| <i>Bacteroides dorei</i>                      | 2            |
| <i>Bartonella apis</i>                        | 5718         |
| <i>Bifidobacterium asteroides</i>             | 95           |
| <i>Bifidobacterium callitrichos</i> DSM 23973 | 6            |
| <i>Bifidobacterium coryneforme</i>            | 237          |
| <i>Bradyrhizobium vignae</i>                  | 2            |
| <i>Dermacoccus profundi</i>                   | 13           |
| <i>Escherichia fergusonii</i> ATCC 35469      | 1            |

|                                        |       |
|----------------------------------------|-------|
| <i>Flavobacterium acidificum</i>       | 1     |
| <i>Frischella perrara</i>              | 5725  |
| <i>Gilliamella apicola</i>             | 9200  |
| <i>Gilliamella bombicola</i>           | 17    |
| <i>Gilliamella intestini</i>           | 29    |
| <i>Lachnoclostridium pacaense</i>      | 19    |
| <i>Lactobacillus apis</i>              | 27304 |
| <i>Lactobacillus helsingborgensis</i>  | 2839  |
| <i>Lactobacillus kimbladii</i>         | 869   |
| <i>Lactobacillus kullabergensis</i>    | 176   |
| <i>Lactobacillus kunkeei</i>           | 8     |
| <i>Lactobacillus mellifer</i>          | 83    |
| <i>Lactobacillus mellis</i>            | 643   |
| <i>Lactobacillus melliventris</i>      | 1297  |
| <i>Lawsonella clevelandensis</i>       | 5     |
| <i>Methylobacterium populi BJ001</i>   | 3     |
| <i>Parasaccharibacter apium</i>        | 37    |
| <i>Pediococcus stilesii</i>            | 180   |
| <i>Pelomonas saccharophila</i>         | 29    |
| <i>Phascolarctobacterium faecium</i>   | 5     |
| <i>Pseudomonas canadensis</i>          | 168   |
| <i>Pseudomonas cerasi</i>              | 119   |
| <i>Pseudomonas songnenensis</i>        | 39    |
| <i>Pseudoxanthomonas jiangsuensis</i>  | 3     |
| <i>Psychrobacter cryohalolentis K5</i> | 103   |
| <i>Ralstonia insidiosa</i>             | 7     |

|                                              |       |
|----------------------------------------------|-------|
| <i>Ralstonia pickettii</i>                   | 393   |
| <i>Romboutsia timonensis</i>                 | 271   |
| <i>Roseburia faecis</i>                      | 1225  |
| <i>Rothia dentocariosa ATCC 17931</i>        | 4     |
| <i>Shinella fusca</i>                        | 2841  |
| <i>Skermanella aerolata</i>                  | 59    |
| <i>Snodgrassella alvi wkb2</i>               | 14705 |
| <i>Sphingomonas echinoides</i>               | 10557 |
| <i>Staphylococcus epidermidis</i>            | 8745  |
| <i>Streptococcus oralis subsp. dentisani</i> | 7369  |
| <i>Streptococcus salivarius</i>              | 17734 |
| <i>Unassigned</i>                            | 17326 |

**Table S14 : Total taxonomic distribution of active ASVs in rectum exposed at 0 ppb**

| <b>ASV Species</b>                            | <b>ASV activity</b> |
|-----------------------------------------------|---------------------|
| <i>Arthrobacter russicus</i>                  | 3                   |
| <i>Bacteroides caccae</i>                     | 1                   |
| <i>Bacteroides plebeius DSM 17135</i>         | 2                   |
| <i>Bartonella apis</i>                        | 9066                |
| <i>Bifidobacterium asteroides</i>             | 30                  |
| <i>Bifidobacterium callitrichos DSM 23973</i> | 9                   |
| <i>Bifidobacterium coryneforme</i>            | 49                  |
| <i>Bradyrhizobium vignae</i>                  | 1                   |
| <i>Brevundimonas albigilva</i>                | 2                   |
| <i>Brevundimonas lenta</i>                    | 1                   |
| <i>Chryseobacterium hispanicum</i>            | 10                  |

|                                                  |       |
|--------------------------------------------------|-------|
| <i>Delftia acidovorans</i>                       | 1     |
| <i>Dermaococcus profundus</i>                    | 11    |
| <i>Dialister invisus</i>                         | 1     |
| <i>Escherichia fergusonii</i> ATCC 35469         | 13    |
| <i>Faecalibacterium prausnitzii</i>              | 12    |
| <i>Flavobacterium acidificum</i>                 | 10    |
| <i>Frischella perrara</i>                        | 6051  |
| <i>Gemmiger formicilis</i>                       | 15    |
| <i>Gilliamella apicola</i>                       | 4582  |
| <i>Gilliamella bombicola</i>                     | 2     |
| <i>Lachnoclostridium pacaense</i>                | 58    |
| <i>Lactobacillus apis</i>                        | 19221 |
| <i>Lactobacillus helsingborgensis</i>            | 5750  |
| <i>Lactobacillus kimbladii</i>                   | 475   |
| <i>Lactobacillus kullabergensis</i>              | 206   |
| <i>Lactobacillus kunkeei</i>                     | 8     |
| <i>Lactobacillus mellifer</i>                    | 66    |
| <i>Lactobacillus mellis</i>                      | 1447  |
| <i>Lactobacillus melliventris</i>                | 1278  |
| <i>Lactobacillus rogosae</i>                     | 1     |
| <i>Lysinibacillus parviboronicapiens</i>         | 3     |
| <i>Methylobacterium populi</i> BJ001             | 3     |
| <i>Morganella morganii</i> subsp. <i>sibonii</i> | 1     |
| <i>Oceanobacillus chironomi</i>                  | 3     |
| <i>Parasaccharibacter apium</i>                  | 41    |
| <i>Pediococcus stilesii</i>                      | 2     |

|                                              |       |
|----------------------------------------------|-------|
| <i>Pelomonas saccharophila</i>               | 51    |
| <i>Pseudaminobacter manganicus</i>           | 19    |
| <i>Pseudomonas canadensis</i>                | 21    |
| <i>Pseudomonas cerasi</i>                    | 152   |
| <i>Pseudomonas songnenensis</i>              | 138   |
| <i>Pseudoxanthomonas jiangsuensis</i>        | 46    |
| <i>Psychrobacter cryohalolentis K5</i>       | 71    |
| <i>Ralstonia pickettii</i>                   | 827   |
| <i>Romboutsia timonensis</i>                 | 1015  |
| <i>Roseburia faecis</i>                      | 810   |
| <i>Rothia dentocariosa ATCC 17931</i>        | 2121  |
| <i>Shinella fusca</i>                        | 7158  |
| <i>Skermanella aerolata</i>                  | 18    |
| <i>Snodgrassella alvi wkb2</i>               | 16394 |
| <i>Sphingomonas echinoides</i>               | 4781  |
| <i>Staphylococcus epidermidis</i>            | 9962  |
| <i>Streptococcus oralis subsp. dentisani</i> | 4892  |
| <i>Streptococcus salivarius</i>              | 22122 |
| <i>Unassigned</i>                            | 13213 |

**Table S15 : Total taxonomic distribution of active ASVs in rectum exposed at 0.1 ppb**

| <b>ASV Species</b>             | <b>ASV activity</b> |
|--------------------------------|---------------------|
| <i>Achromobacter insolitus</i> | 1                   |
| <i>Bacillus licheniformis</i>  | 2                   |
| <i>Bacillus wiedmannii</i>     | 1                   |
| <i>Bacteroides dorei</i>       | 3                   |

|                                           |       |
|-------------------------------------------|-------|
| <i>Bartonella apis</i>                    | 4194  |
| <i>Bifidobacterium asteroides</i>         | 22    |
| <i>Bifidobacterium coryneforme</i>        | 181   |
| <i>Bosea vaviloviae</i>                   | 1     |
| <i>Dermaococcus profundi</i>              | 16    |
| <i>Faecalibacterium prausnitzii</i>       | 1     |
| <i>Frischella perrara</i>                 | 1336  |
| <i>Gemmiger formicilis</i>                | 1     |
| <i>Gilliamella apicola</i>                | 3217  |
| <i>Lactobacillus apis</i>                 | 28894 |
| <i>Lactobacillus helsingborgensis</i>     | 3699  |
| <i>Lactobacillus kimbladii</i>            | 642   |
| <i>Lactobacillus kullabergensis</i>       | 43    |
| <i>Lactobacillus kunkei</i>               | 4     |
| <i>Lactobacillus mellifer</i>             | 35    |
| <i>Lactobacillus mellis</i>               | 314   |
| <i>Lactobacillus melliventris</i>         | 1990  |
| <i>Lawsonella clevelandensis</i>          | 5     |
| <i>Lysinibacillus parviboronicapiens</i>  | 2     |
| <i>Morganella morganii subsp. sibonii</i> | 2     |
| <i>Oceanobacillus chironomi</i>           | 2     |
| <i>Pediococcus stilesii</i>               | 3     |
| <i>Pelomonas saccharophila</i>            | 86    |
| <i>Pseudaminobacter manganicus</i>        | 31    |
| <i>Pseudomonas canadensis</i>             | 2     |
| <i>Pseudomonas cerasi</i>                 | 99    |



|                                                     |       |
|-----------------------------------------------------|-------|
| <i>Pseudomonas songnenensis</i>                     | 299   |
| <i>Pseudoxanthomonas jiangsuensis</i>               | 7     |
| <i>Psychrobacter cryohalolentis</i> K5              | 247   |
| <i>Ralstonia insidiosa</i>                          | 16    |
| <i>Ralstonia pickettii</i>                          | 685   |
| <i>Romboutsia timonensis</i>                        | 670   |
| <i>Roseburia faecis</i>                             | 948   |
| <i>Rothia dentocariosa</i> ATCC 17931               | 14    |
| <i>Shinella fusca</i>                               | 6266  |
| <i>Snodgrassella alvi</i> wkB2                      | 15445 |
| <i>Sphingomonas echinoides</i>                      | 7055  |
| <i>Staphylococcus epidermidis</i>                   | 10553 |
| <i>Streptococcus oralis</i> subsp. <i>dentisani</i> | 5059  |
| <i>Streptococcus salivarius</i>                     | 16578 |
| Unassigned                                          | 21276 |

**Table S16 : Total taxonomic distribution of active ASVs in rectum exposed at 1 ppb**

| ASV Species                                   | ASV activity |
|-----------------------------------------------|--------------|
| <i>[Clostridium] saccharolyticum</i>          | 3            |
| <i>Bacteroides caccae</i>                     | 1            |
| <i>Bartonella apis</i>                        | 7534         |
| <i>Bifidobacterium asteroides</i>             | 21           |
| <i>Bifidobacterium callitrichos</i> DSM 23973 | 7            |
| <i>Bifidobacterium coryneforme</i>            | 62           |
| <i>Blautia wexlerae</i> DSM 19850             | 1            |
| <i>Bradyrhizobium vignae</i>                  | 2            |

|                                           |       |
|-------------------------------------------|-------|
| <i>Dermaococcus profundus</i>             | 14    |
| <i>Frischella perrara</i>                 | 4818  |
| <i>Gilliamella apicola</i>                | 2004  |
| <i>Gilliamella bombicola</i>              | 3     |
| <i>Gilliamella intestini</i>              | 1     |
| <i>Lachnoclostridium pacaense</i>         | 41    |
| <i>Lactobacillus apis</i>                 | 25179 |
| <i>Lactobacillus helsingborgensis</i>     | 3021  |
| <i>Lactobacillus kimbladii</i>            | 569   |
| <i>Lactobacillus kullabergensis</i>       | 59    |
| <i>Lactobacillus kunkeei</i>              | 12    |
| <i>Lactobacillus mellifer</i>             | 115   |
| <i>Lactobacillus mellis</i>               | 677   |
| <i>Lactobacillus melliventris</i>         | 776   |
| <i>Lactobacillus rogosae</i>              | 1     |
| <i>Lysinibacillus parviboronicapiens</i>  | 8     |
| <i>Morganella morganii subsp. sibonii</i> | 1     |
| <i>Oceanobacillus chironomi</i>           | 1     |
| <i>Pediococcus stilesii</i>               | 6     |
| <i>Pelomonas saccharophila</i>            | 38    |
| <i>Pseudaminobacter manganicus</i>        | 36    |
| <i>Pseudomonas canadensis</i>             | 5     |
| <i>Pseudomonas cerasi</i>                 | 113   |
| <i>Pseudomonas songnenensis</i>           | 54    |
| <i>Pseudoxanthomonas jiangsuensis</i>     | 3     |
| <i>Psychrobacter cryohalolentis K5</i>    | 106   |

|                                              |       |
|----------------------------------------------|-------|
| <i>Ralstonia pickettii</i>                   | 434   |
| <i>Romboutsia timonensis</i>                 | 1316  |
| <i>Roseburia faecis</i>                      | 1781  |
| <i>Shinella fusca</i>                        | 4981  |
| <i>Skermanella aerolata</i>                  | 5     |
| <i>Snodgrassella alvi wkb2</i>               | 17562 |
| <i>Sphingomonas echinoides</i>               | 6088  |
| <i>Staphylococcus epidermidis</i>            | 5581  |
| <i>Streptococcus oralis subsp. dentisani</i> | 1182  |
| <i>Streptococcus salivarius</i>              | 18194 |
| <i>Unassigned</i>                            | 19626 |

**Table S17 : Total taxonomic distribution of active ASVs in rectum exposed at 10 ppb**

| <b>ASV Species</b>                            | <b>ASV activity</b> |
|-----------------------------------------------|---------------------|
| <i>[Clostridium] saccharolyticum</i>          | 3                   |
| <i>Bacteroides caccae</i>                     | 1                   |
| <i>Bartonella apis</i>                        | 7534                |
| <i>Bifidobacterium asteroides</i>             | 21                  |
| <i>Bifidobacterium callitrichos DSM 23973</i> | 7                   |
| <i>Bifidobacterium coryneforme</i>            | 62                  |
| <i>Blautia wexlerae DSM 19850</i>             | 1                   |
| <i>Bradyrhizobium vignae</i>                  | 2                   |
| <i>Dermacoccus profundus</i>                  | 14                  |
| <i>Frischella perrara</i>                     | 4818                |
| <i>Gilliamella apicola</i>                    | 2004                |
| <i>Gilliamella bombicola</i>                  | 3                   |

|                                           |       |
|-------------------------------------------|-------|
| <i>Gilliamella intestini</i>              | 1     |
| <i>Lachnoclostridium pacaense</i>         | 41    |
| <i>Lactobacillus apis</i>                 | 25179 |
| <i>Lactobacillus helsingborgensis</i>     | 3021  |
| <i>Lactobacillus kimbladii</i>            | 569   |
| <i>Lactobacillus kullabergensis</i>       | 59    |
| <i>Lactobacillus kunkeei</i>              | 12    |
| <i>Lactobacillus mellifer</i>             | 115   |
| <i>Lactobacillus mellis</i>               | 677   |
| <i>Lactobacillus melliventris</i>         | 776   |
| <i>Lactobacillus rogosae</i>              | 1     |
| <i>Lysinibacillus parviboronicapiens</i>  | 8     |
| <i>Morganella morganii subsp. sibonii</i> | 1     |
| <i>Oceanobacillus chironomi</i>           | 1     |
| <i>Pediococcus stilesii</i>               | 6     |
| <i>Pelomonas saccharophila</i>            | 38    |
| <i>Pseudaminobacter manganicus</i>        | 36    |
| <i>Pseudomonas canadensis</i>             | 5     |
| <i>Pseudomonas cerasi</i>                 | 113   |
| <i>Pseudomonas songnenensis</i>           | 54    |
| <i>Pseudoxanthomonas jiangsuensis</i>     | 3     |
| <i>Psychrobacter cryohalolentis K5</i>    | 106   |
| <i>Ralstonia pickettii</i>                | 434   |
| <i>Romboutsia timonensis</i>              | 1316  |
| <i>Roseburia faecis</i>                   | 1781  |
| <i>Shinella fusca</i>                     | 4981  |

|                                              |       |
|----------------------------------------------|-------|
| <i>Skermanella aerolata</i>                  | 5     |
| <i>Snodgrassella alvi wkb2</i>               | 17562 |
| <i>Sphingomonas echinoides</i>               | 6088  |
| <i>Staphylococcus epidermidis</i>            | 5581  |
| <i>Streptococcus oralis subsp. dentisani</i> | 1182  |
| <i>Streptococcus salivarius</i>              | 18194 |
| <i>Unassigned</i>                            | 19626 |

**Table S18 : Network metrics for gut microbiome taxa in midgut exposed to 0 ppb clothianidin**

CC = Closeness centrality, DG = Degree, NC = Neighborhood Connectivity

| Taxa name (spp.)             | ASV classification | CC         | DG | NC          | ASV activity |
|------------------------------|--------------------|------------|----|-------------|--------------|
| <i>Bartonella</i>            | Non-core           | 0.65671642 | 22 | 14.22727273 | 15007        |
| <i>Pediococcus</i>           | Low abundant       | 0.61971831 | 22 | 12.04545455 | 230          |
| <i>Pelomonas</i>             | Low abundant       | 0.61111111 | 17 | 16.41176471 | 1            |
| <i>Acinetobacter</i>         | Low abundant       | 0.61111111 | 17 | 16.41176471 | 4            |
| <i>Leifsonia</i>             | Low abundant       | 0.61111111 | 17 | 16.41176471 | 6            |
| <i>Morganella</i>            | Low abundant       | 0.61111111 | 17 | 16.41176471 | 2            |
| <i>Phascolarctobacterium</i> | Low abundant       | 0.61111111 | 17 | 16.41176471 | 10           |
| <i>Staphylococcus</i>        | Low abundant       | 0.61111111 | 17 | 15.64705882 | 8            |
| <i>Devosia</i>               | Low abundant       | 0.61111111 | 17 | 16.41176471 | 17           |
| <i>Snodgrassella</i>         | Core               | 0.60273973 | 18 | 14.61111111 | 10367        |
| <i>Bradyrhizobium</i>        | Low abundant       | 0.58666667 | 15 | 16.13333333 | 43           |
| <i>Lachnoclostridium</i>     | Low abundant       | 0.57894737 | 16 | 14.375      | 155          |

|                          |              |            |    |             |       |
|--------------------------|--------------|------------|----|-------------|-------|
| <i>Rothia</i>            | Low abundant | 0.57142857 | 13 | 13.38461538 | 1     |
| <i>Streptococcus</i>     | Low abundant | 0.57142857 | 13 | 13.38461538 | 36    |
| <i>Intestinibacter</i>   | Low abundant | 0.57142857 | 13 | 13.38461538 | 63    |
| <i>Escherichia</i>       | Low abundant | 0.56410256 | 12 | 11.41666667 | 1     |
| Unassigned               | unassigned   | 0.55696203 | 12 | 12.5        | 14420 |
| <i>Flavobacterium</i>    | Low abundant | 0.55       | 16 | 14.375      | 10    |
| <i>Achromobacter</i>     | Low abundant | 0.55       | 12 | 11.41666667 | 42    |
| <i>Prevotella</i>        | Low abundant | 0.55       | 16 | 14.375      | 32    |
| <i>Frischella</i>        | Non-core     | 0.55       | 12 | 12.75       | 29145 |
| <i>Arthrobacter</i>      | Low abundant | 0.54320988 | 15 | 15.33333333 | 29    |
| <i>Bosea</i>             | Low abundant | 0.54320988 | 15 | 15.33333333 | 37    |
| <i>Lactobacillus</i>     | Core         | 0.54320988 | 12 | 13.08333333 | 38528 |
| <i>Pseudoxanthomonas</i> | Low abundant | 0.53012048 | 11 | 15.36363636 | 6     |
| <i>Brevundimonas</i>     | Low abundant | 0.53012048 | 13 | 12.92307692 | 65    |
| <i>Delftia</i>           | Low abundant | 0.53012048 | 10 | 12.4        | 96    |
| <i>Bifidobacterium</i>   | Core         | 0.51764706 | 11 | 10.36363636 | 195   |
| <i>Bombella</i>          | Non-core     | 0.51764706 | 7  | 13.28571429 | 204   |
| <i>Acidocella</i>        | Low abundant | 0.51162791 | 8  | 12          | 10    |
| <i>Barnesiella</i>       | Low abundant | 0.50574713 | 10 | 13          | 4     |
| <i>Dialister</i>         | Low abundant | 0.50574713 | 10 | 13          | 7     |
| <i>Commensalibacter</i>  | Non-core     | 0.50574713 | 8  | 10          | 28    |
| <i>Roseburia</i>         | Low abundant | 0.50574713 | 9  | 12.77777778 | 85    |
| <i>Pseudomonas</i>       | Low abundant | 0.50574713 | 10 | 13          | 1     |
| <i>Actinomyces</i>       | Low abundant | 0.49438202 | 6  | 13          | 6     |
| <i>Gilliamella</i>       | Non-core     | 0.49438202 | 9  | 12.77777778 | 11407 |

|                           |              |            |    |             |      |
|---------------------------|--------------|------------|----|-------------|------|
| <i>Gemmiger</i>           | Low abundant | 0.48888889 | 6  | 11          | 1    |
| <i>Anaerobiospirillum</i> | Low abundant | 0.48888889 | 6  | 11          | 1    |
| <i>Phyllobacterium</i>    | Low abundant | 0.48888889 | 6  | 11          | 2    |
| <i>Shinella</i>           | Low abundant | 0.48351648 | 11 | 12.72727273 | 3    |
| <i>Parasaccharibacter</i> | Non-core     | 0.46808511 | 10 | 11.1        | 1117 |
| <i>Faecalibacterium</i>   | Low abundant | 0.44897959 | 8  | 11.5        | 6    |
| <i>Dermacoccus</i>        | Low abundant | 0.44444444 | 3  | 14          | 2    |
| <i>Pseudaminobacter</i>   | Low abundant | 0.40366972 | 3  | 9.33333333  | 2    |

**Table S19 : Network metrics for gut microbiome taxa in midgut exposed to 0.1 ppb clothianidin**

CC = Closeness centrality, DG = Degree, NC = Neighborhood Connectivity

| <b>Taxa name (spp.)</b>   | <b>ASV Classification</b> | <b>CC</b>  | <b>DG</b> | <b>NC</b>   | <b>ASV activity</b> |
|---------------------------|---------------------------|------------|-----------|-------------|---------------------|
| <i>Frischella</i>         | Non-core                  | 0.56666667 | 8         | 10.625      | 20817               |
| <i>Bartonella</i>         | Non-core                  | 0.61818182 | 14        | 10.42857143 | 17761               |
| <i>Lactobacillus</i>      | Core                      | 0.66666667 | 17        | 9.70588235  | 34363               |
| <i>Snodgrassella</i>      | Core                      | 0.59649123 | 11        | 10.45454545 | 12928               |
| Unassigned                | unassigned                | 0.60714286 | 12        | 10.5        | 20940               |
| <i>Gilliamella</i>        | Non-core                  | 0.53125    | 8         | 9.875       | 12598               |
| <i>Parasaccharibacter</i> | Non-core                  | 0.60714286 | 12        | 10.25       | 3                   |
| <i>Bombella</i>           | Non-core                  | 0.5862069  | 11        | 10.36363636 | 404                 |
| <i>Bacillus</i>           | Low abundant              | 0.56666667 | 10        | 10.1        | 266                 |
| <i>Bifidobacterium</i>    | Core                      | 0.5483871  | 8         | 11.125      | 544                 |
| <i>Pediococcus</i>        | Low abundant              | 0.5862069  | 11        | 10.54545455 | 256                 |
| <i>Lachnoclostridium</i>  | Low abundant              | 0.60714286 | 13        | 10          | 31                  |

|                           |              |            |    |             |     |
|---------------------------|--------------|------------|----|-------------|-----|
| <i>Ralstonia</i>          | Low abundant | 0.60714286 | 13 | 10.61538462 | 122 |
| <i>Pseudomonas</i>        | Low abundant | 0.55737705 | 9  | 9.66666667  | 4   |
| <i>Delftia</i>            | Low abundant | 0.53968254 | 7  | 9.85714286  | 6   |
| <i>Bradyrhizobium</i>     | Low abundant | 0.51515152 | 7  | 10.85714286 | 17  |
| <i>Streptococcus</i>      | Low abundant | 0.5862069  | 10 | 9.9         | 1   |
| <i>Commensalibacter</i>   | Non-core     | 0.61818182 | 13 | 9.92307692  | 72  |
| <i>Prevotella</i>         | Low abundant | 0.5862069  | 10 | 12.2        | 1   |
| <i>Methylobacterium</i>   | Low abundant | 0.5862069  | 11 | 10.63636364 | 3   |
| <i>Oceanobacillus</i>     | Low abundant | 0.5862069  | 10 | 12.2        | 22  |
| <i>Lysinibacillus</i>     | Low abundant | 0.52307692 | 7  | 11.42857143 | 1   |
| <i>Blautia</i>            | Low abundant | 0.5483871  | 8  | 10.5        | 3   |
| <i>Faecalibacterium</i>   | Low abundant | 0.5483871  | 8  | 10.5        | 1   |
| <i>Acidocella</i>         | Low abundant | 0.55737705 | 8  | 11.5        | 26  |
| <i>Achromobacter</i>      | Low abundant | 0.53125    | 7  | 10.42857143 | 2   |
| <i>Anaerobiospirillum</i> | Low abundant | 0.55737705 | 9  | 9.33333333  | 4   |
| <i>Staphylococcus</i>     | Low abundant | 0.55737705 | 11 | 10          | 4   |
| <i>Shinella</i>           | Low abundant | 0.53968254 | 10 | 9.7         | 12  |
| <i>Flavobacterium</i>     | Low abundant | 0.5483871  | 10 | 10.4        | 3   |
| <i>Escherichia</i>        | Low abundant | 0.5483871  | 8  | 10.625      | 1   |
| <i>Thiohalobacter</i>     | Low abundant | 0.56666667 | 9  | 11.33333333 | 10  |
| <i>Acinetobacter</i>      | Low abundant | 0.53125    | 7  | 10.42857143 | 1   |
| <i>Pelomonas</i>          | Low abundant | 0.61818182 | 13 | 10.46153846 | 3   |
| <i>Moraxella</i>          | Low abundant | 0.48571429 | 4  | 13.5        | 1   |

**Table S20 : Network metrics for gut microbiome taxa in midgut exposed to 1 ppb clothianidin**



CC = Closeness centrality, DG = Degree, NC = Neighborhood Connectivity

| <b>Taxa name (spp.)</b>   | <b>ASV Classification</b> | <b>CC</b>  | <b>DG</b> | <b>NC</b>   | <b>ASV activity</b> |
|---------------------------|---------------------------|------------|-----------|-------------|---------------------|
| <i>Frischella</i>         | Non-core                  | 0.66037736 | 18        | 9.77777778  | 11964               |
| <i>Lactobacillus</i>      | Core                      | 0.57377049 | 11        | 10.90909091 | 49115               |
| <i>Gilliamella</i>        | Non-core                  | 0.55555556 | 9         | 10.11111111 | 3576                |
| Unassigned                | unassigned                | 0.64814815 | 16        | 10.125      | 20649               |
| <i>Snodgrassella</i>      | Core                      | 0.5        | 6         | 9.66666667  | 19115               |
| <i>Parasaccharibacter</i> | Non-core                  | 0.57377049 | 11        | 10.54545455 | 7050                |
| <i>Bombella</i>           | Non-core                  | 0.58333333 | 11        | 10.54545455 | 282                 |
| <i>Bacillus</i>           | Low abundant              | 0.47297297 | 7         | 9.71428571  | 372                 |
| <i>Bifidobacterium</i>    | Core                      | 0.56451613 | 13        | 9.84615385  | 522                 |
| <i>Pediococcus</i>        | Low abundant              | 0.55555556 | 10        | 10.6        | 182                 |
| <i>Lachnoclostridium</i>  | Low abundant              | 0.46666667 | 5         | 10          | 41                  |
| <i>Ralstonia</i>          | Low abundant              | 0.57377049 | 11        | 9.45454545  | 10                  |
| <i>Bartonella</i>         | Non-core                  | 0.43209877 | 3         | 9.66666667  | 10349               |
| <i>Roseburia</i>          | Low abundant              | 0.55555556 | 10        | 10.4        | 2                   |
| <i>Delftia</i>            | Low abundant              | 0.45454545 | 6         | 8.5         | 3                   |
| <i>Bradyrhizobium</i>     | Low abundant              | 0.5        | 8         | 10.625      | 12                  |
| <i>Streptococcus</i>      | Low abundant              | 0.56451613 | 11        | 10.90909091 | 5                   |
| <i>Commensalibacter</i>   | Non-core                  | 0.55555556 | 10        | 10.4        | 98                  |
| <i>Bacteroides</i>        | Low abundant              | 0.58333333 | 10        | 9.8         | 5                   |
| <i>Pseudoxanthomonas</i>  | Low abundant              | 0.53846154 | 8         | 8.875       | 6                   |
| <i>Prevotella</i>         | Low abundant              | 0.56451613 | 10        | 9.5         | 1                   |

|                           |              |            |    |                  |    |
|---------------------------|--------------|------------|----|------------------|----|
| <i>Methylobacterium</i>   | Low abundant | 0.546875   | 9  | 10.77777777<br>8 | 6  |
| <i>Phyllobacterium</i>    | Low abundant | 0.53030303 | 11 | 9                | 32 |
| <i>Lysinibacillus</i>     | Low abundant | 0.53030303 | 9  | 10.33333333<br>3 | 30 |
| <i>Faecalibacterium</i>   | Low abundant | 0.33653846 | 1  | 6                | 4  |
| <i>Acidocella</i>         | Low abundant | 0.53030303 | 9  | 10               | 46 |
| <i>Achromobacter</i>      | Low abundant | 0.52238806 | 9  | 10.44444444<br>4 | 2  |
| <i>Anaerobiospirillum</i> | Low abundant | 0.42682927 | 4  | 8.75             | 5  |
| <i>Shinella</i>           | Low abundant | 0.50724638 | 6  | 11.16666666<br>7 | 7  |
| <i>Flavobacterium</i>     | Low abundant | 0.58333333 | 10 | 10.6             | 3  |
| <i>Dermacoccus</i>        | Low abundant | 0.52238806 | 9  | 10.44444444<br>4 | 6  |
| <i>Chryseobacterium</i>   | Low abundant | 0.5        | 7  | 10.1428571<br>4  | 1  |
| <i>Escherichia</i>        | Low abundant | 0.58333333 | 11 | 10.7272727<br>3  | 3  |
| <i>Lawsonella</i>         | Low abundant | 0.52238806 | 9  | 10.44444444<br>4 | 1  |
| <i>Porphyromonas</i>      | Low abundant | 0.5        | 7  | 10.1428571<br>4  | 2  |
| <i>Mycobacterium</i>      | Low abundant | 0.47297297 | 7  | 8.42857143       | 3  |

**Table S21 : Network metrics for gut microbiome taxa in midgut exposed to 10 ppb clothianidin**

CC = Closeness centrality, DG = Degree, NC = Neighborhood Connectivity

| Taxa name (spp.)     | ASV Classification | CC         | DG | NC         | ASV activity |
|----------------------|--------------------|------------|----|------------|--------------|
| <i>Snodgrassella</i> | Core               | 0.62745098 | 13 | 8.38461538 | 7386         |

|                           |              |            |    |             |       |
|---------------------------|--------------|------------|----|-------------|-------|
| <i>Bifidobacterium</i>    | Core         | 0.60377358 | 14 | 9.5         | 595   |
| <i>Parasaccharibacter</i> | Non-core     | 0.59259259 | 14 | 8.57142857  | 2317  |
| <i>Acidocella</i>         | Low abundant | 0.59259259 | 10 | 9.4         | 58    |
| <i>Anaerobiospirillum</i> | Low abundant | 0.59259259 | 12 | 8.41666667  | 45    |
| <i>Rothia</i>             | Low abundant | 0.59259259 | 11 | 9.90909091  | 1     |
| <i>Bartonella</i>         | Non-core     | 0.58181818 | 10 | 10.6        | 15516 |
| <i>Leifsonia</i>          | Low abundant | 0.58181818 | 10 | 9.5         | 1     |
| <i>Thiohalobacter</i>     | Low abundant | 0.58181818 | 10 | 9.5         | 1     |
| <i>Pelomonas</i>          | Low abundant | 0.58181818 | 10 | 9.5         | 1     |
| <i>Commensalibacter</i>   | Non-core     | 0.57142857 | 9  | 10.11111111 | 111   |
| <i>Staphylococcus</i>     | Low abundant | 0.56140351 | 9  | 9.66666667  | 3     |
| <i>Lactobacillus</i>      | Core         | 0.55172414 | 8  | 9.125       | 51835 |
| Unassigned                | unassigned   | 0.55172414 | 9  | 9.88888889  | 28981 |
| <i>Roseburia</i>          | Low abundant | 0.55172414 | 8  | 10          | 3     |
| <i>Shinella</i>           | Low abundant | 0.55172414 | 8  | 7.625       | 14    |
| <i>Bombella</i>           | Non-core     | 0.54237288 | 10 | 10.4        | 3     |
| <i>Achromobacter</i>      | Low abundant | 0.54237288 | 10 | 10.4        | 6     |
| <i>Ralstonia</i>          | Low abundant | 0.53333333 | 10 | 9.1         | 9     |
| <i>Pediococcus</i>        | Low abundant | 0.49230769 | 6  | 8.83333333  | 121   |
| <i>Streptococcus</i>      | Low abundant | 0.49230769 | 8  | 10.125      | 4     |
| <i>Phyllobacterium</i>    | Low abundant | 0.49230769 | 8  | 10.125      | 3     |
| <i>Lawsonella</i>         | Low abundant | 0.49230769 | 8  | 10.125      | 4     |
| <i>Actinomyces</i>        | Low abundant | 0.49230769 | 8  | 10.125      | 1     |
| <i>Bacillus</i>           | Low abundant | 0.48484848 | 7  | 8.28571429  | 54    |

|                          |              |            |   |            |       |
|--------------------------|--------------|------------|---|------------|-------|
| <i>Frischella</i>        | Non-core     | 0.48484848 | 7 | 8.57142857 | 10132 |
| <i>Pseudomonas</i>       | Low abundant | 0.48484848 | 7 | 8          | 3     |
| <i>Lachnoclostridium</i> | Low abundant | 0.47761194 | 4 | 9.75       | 102   |
| <i>Flavobacterium</i>    | Low abundant | 0.47761194 | 4 | 9.75       | 2     |
| <i>Gilliamella</i>       | Core         | 0.47058824 | 7 | 8.57142857 | 19862 |
| <i>Pseudoxanthomonas</i> | Low abundant | 0.45714286 | 4 | 8.5        | 1     |
| <i>Delftia</i>           | Low abundant | 0.44444444 | 5 | 10.2       | 5     |
| <i>Faecalibacterium</i>  | Low abundant | 0.4        | 2 | 7.5        | 3     |

**Table S22 : Network metrics for gut microbiome taxa in ileum exposed to 0 ppb clothianidin**

CC = Closeness centrality, DG = Degree, NC = Neighborhood Connectivity

| <b>Taxa name (spp.)</b> | <b>ASV Classification</b> | <b>CC</b>  | <b>DG</b> | <b>NC</b>   | <b>ASV activity</b> |
|-------------------------|---------------------------|------------|-----------|-------------|---------------------|
| <i>Bartonella</i>       | Non-core                  | 0.62962963 | 19        | 11.10526316 | 10013               |
| <i>Lactobacillus</i>    | Core                      | 0.61818182 | 13        | 10          | 48171               |
| <i>Commensalibacter</i> | Non-core                  | 0.59649123 | 16        | 10.875      | 48                  |
| <i>Pediococcus</i>      | Low abundant              | 0.59649123 | 13        | 10.38461538 | 236                 |
| <i>Bifidobacterium</i>  | Core                      | 0.59649123 | 17        | 10.82352941 | 108                 |
| Unassigned              | Unassigned                | 0.59649123 | 16        | 10.875      | 9830                |
| <i>Frischella</i>       | Low abundant              | 0.59649123 | 12        | 11.5        | 30344               |
| <i>Snodgrassella</i>    | Core                      | 0.5862069  | 14        | 10.92857143 | 24749               |

|                           |              |            |    |             |      |
|---------------------------|--------------|------------|----|-------------|------|
| <i>Gilliamella</i>        | Core         | 0.57627119 | 12 | 9.25        | 7453 |
| <i>Lachnoclostridium</i>  | Low abundant | 0.56666667 | 8  | 8.75        | 5    |
| <i>Blautia</i>            | Low abundant | 0.55737705 | 9  | 12.22222222 | 21   |
| <i>Parasaccharibacter</i> | Non-core     | 0.55737705 | 8  | 9.5         | 252  |
| <i>Sphingomonas</i>       | Low abundant | 0.53968254 | 8  | 10.625      | 1    |
| <i>Brevundimonas</i>      | Low abundant | 0.53968254 | 12 | 11.75       | 4    |
| <i>Acinetobacter</i>      | Low abundant | 0.53125    | 11 | 13.81818182 | 2    |
| <i>Escherichia</i>        | Low abundant | 0.53125    | 11 | 13.81818182 | 1    |
| <i>Faecalibacterium</i>   | Low abundant | 0.53125    | 11 | 13.81818182 | 3    |
| <i>Bacteroides</i>        | Low abundant | 0.53125    | 11 | 13.81818182 | 2    |
| <i>Achromobacter</i>      | Low abundant | 0.52307692 | 7  | 11.42857143 | 1    |
| <i>Acidocella</i>         | Low abundant | 0.51515152 | 8  | 12.125      | 10   |
| <i>Pelomonas</i>          | Low abundant | 0.50746269 | 7  | 12          | 1    |
| <i>Arthrobacter</i>       | Low abundant | 0.50746269 | 9  | 13          | 5    |
| <i>Shinella</i>           | Low abundant | 0.5        | 7  | 13.71428571 | 2    |
| <i>Delftia</i>            | Low abundant | 0.5        | 7  | 13.71428571 | 1    |
| <i>Bombella</i>           | Non-core     | 0.5        | 6  | 11.33333333 | 123  |
| <i>Oceanobacillus</i>     | Low abundant | 0.47887324 | 6  | 11.33333333 | 2    |

|                           |              |            |   |            |    |
|---------------------------|--------------|------------|---|------------|----|
| <i>Pseudaminobacter</i>   | Low abundant | 0.45945946 | 4 | 10.25      | 3  |
| <i>Methylobacterium</i>   | Low abundant | 0.45333333 | 4 | 7.75       | 25 |
| <i>Flavobacterium</i>     | Low abundant | 0.44736842 | 3 | 9.66666667 | 3  |
| <i>Anaerobiospirillum</i> | Low abundant | 0.44155844 | 5 | 7          | 3  |
| <i>Rothia</i>             | Low abundant | 0.41975309 | 3 | 7.33333333 | 2  |
| <i>Streptococcus</i>      | Low abundant | 0.4047619  | 5 | 5.4        | 2  |
| <i>Roseburia</i>          | Low abundant | 0.4047619  | 5 | 5.4        | 2  |
| <i>Pseudomonas</i>        | Low abundant | 0.4047619  | 5 | 5.4        | 5  |
| <i>Bradyrhizobium</i>     | Low abundant | 0.34693878 | 4 | 4.75       | 5  |

**Table S23 : Network metrics for gut microbiome taxa in ileum exposed to 0.1 ppb clothianidin**

CC = Closeness centrality, DG = Degree, NC = Neighborhood Connectivity

| Taxa name (spp.)       | ASV Classification | CC             | DG | NC              | ASV activity |
|------------------------|--------------------|----------------|----|-----------------|--------------|
| Unassigned             | unassigned         | 0.6507936<br>5 | 19 | 10.84210<br>526 | 14500        |
| <i>Bifidobacterium</i> | Core               | 0.6307692<br>3 | 17 | 9.647058<br>82  | 318          |
| <i>Acidocella</i>      | Low abundant       | 0.6029411<br>8 | 14 | 12.35714<br>286 | 13           |
| <i>Streptococcus</i>   | Low abundant       | 0.6029411<br>8 | 15 | 11.4            | 7            |
| <i>Bartonella</i>      | Non-core           | 0.6029411<br>8 | 15 | 11.8            | 13269        |

|                          |              |                |    |                 |       |
|--------------------------|--------------|----------------|----|-----------------|-------|
| <i>Actinomyces</i>       | Low abundant | 0.5774647<br>9 | 12 | 11.16666<br>667 | 1     |
| <i>Lawsonella</i>        | Low abundant | 0.5774647<br>9 | 12 | 11.16666<br>667 | 3     |
| <i>Pediococcus</i>       | Low abundant | 0.5774647<br>9 | 12 | 11              | 283   |
| <i>Bacillus</i>          | Low abundant | 0.5774647<br>9 | 14 | 10.64285<br>714 | 116   |
| <i>Oceanobacillus</i>    | Low abundant | 0.5694444<br>4 | 14 | 10.92857<br>143 | 1     |
| <i>Phyllobacterium</i>   | Low abundant | 0.5694444<br>4 | 14 | 10.92857<br>143 | 3     |
| <i>Delftia</i>           | Low abundant | 0.5694444<br>4 | 12 | 11.16666<br>667 | 8     |
| <i>Pelomonas</i>         | Low abundant | 0.5616438<br>4 | 10 | 12.6            | 2     |
| <i>Shinella</i>          | Low abundant | 0.5616438<br>4 | 11 | 10.81818<br>182 | 12    |
| <i>Acinetobacter</i>     | Low abundant | 0.5540540<br>5 | 11 | 10.63636<br>364 | 4     |
| <i>Flavobacterium</i>    | Low abundant | 0.5466666<br>7 | 11 | 12.90909<br>091 | 10    |
| <i>Lactobacillus</i>     | Core         | 0.5466666<br>7 | 12 | 11.66666<br>667 | 55511 |
| <i>Sphingomonas</i>      | Low abundant | 0.5394736<br>8 | 10 | 10.4            | 6     |
| <i>Ralstonia</i>         | Low abundant | 0.5394736<br>8 | 11 | 8.545454<br>55  | 285   |
| <i>Lachnoclostridium</i> | Low abundant | 0.5394736<br>8 | 8  | 13.875          | 12    |
| <i>Frischella</i>        | Non-core     | 0.5394736<br>8 | 11 | 9               | 15057 |
| <i>Polynucleobacter</i>  | Low abundant | 0.5324675<br>3 | 7  | 13.57142<br>857 | 4     |

|                           |              |                |    |                 |       |
|---------------------------|--------------|----------------|----|-----------------|-------|
| <i>Leifsonia</i>          | Low abundant | 0.5324675<br>3 | 7  | 13.57142<br>857 | 1     |
| <i>Commensalibacter</i>   | Non-core     | 0.5324675<br>3 | 10 | 10.3            | 44    |
| <i>Anaerobiospirillum</i> | Low abundant | 0.5256410<br>3 | 9  | 13.44444<br>444 | 6     |
| <i>Rothia</i>             | Low abundant | 0.5189873<br>4 | 8  | 12.875          | 1     |
| <i>Psychrobacter</i>      | Low abundant | 0.5189873<br>4 | 8  | 9.5             | 18    |
| <i>Bradyrhizobium</i>     | Low abundant | 0.5125         | 8  | 10.875          | 12    |
| <i>Roseburia</i>          | Low abundant | 0.5125         | 7  | 11              | 2     |
| <i>Chryseobacterium</i>   | Low abundant | 0.5061728<br>4 | 8  | 9.625           | 1     |
| <i>Achromobacter</i>      | Low abundant | 0.5061728<br>4 | 9  | 10.44444<br>444 | 3     |
| <i>Methylobacterium</i>   | Low abundant | 0.5061728<br>4 | 8  | 9.625           | 1     |
| <i>Bombella</i>           | Non-core     | 0.5061728<br>4 | 7  | 11              | 2316  |
| <i>Gilliamella</i>        | Core         | 0.5061728<br>4 | 10 | 9.8             | 7918  |
| <i>Parasaccharibacter</i> | Non-core     | 0.5061728<br>4 | 7  | 11              | 64    |
| <i>Thiohalobacter</i>     | Low abundant | 0.5            | 6  | 11.33333<br>333 | 2     |
| <i>Bacteroides</i>        | Low abundant | 0.5            | 6  | 11              | 1     |
| <i>Snodgrassella</i>      | Core         | 0.5            | 7  | 11.14285<br>714 | 20309 |
| <i>Staphylococcus</i>     | Low abundant | 0.4767441<br>9 | 6  | 12.66666<br>667 | 1     |
| <i>Lysinibacillus</i>     | Low abundant | 0.4767441<br>9 | 6  | 12.66666<br>667 | 2     |



|                      |              |                |   |     |     |
|----------------------|--------------|----------------|---|-----|-----|
| <i>Pseudomonas</i>   | Low abundant | 0.4659090<br>9 | 8 | 10  | 122 |
| <i>Brevundimonas</i> | Low abundant | 0.4606741<br>6 | 5 | 9.8 | 4   |

**Table S24 : Network metrics for gut microbiome taxa in ileum exposed to 1 ppb clothianidin**

CC = Closeness centrality, DG = Degree, NC = Neighborhood Connectivity

| <b>Taxa name (spp.)</b>  | <b>ASV Classification</b> | <b>CC</b>      | <b>DG</b> | <b>NC</b>       | <b>ASV activity</b> |
|--------------------------|---------------------------|----------------|-----------|-----------------|---------------------|
| <i>Methylobacterium</i>  | Low abundant              | 0.6842105<br>3 | 22        | 14.31818<br>182 | 10                  |
| <i>Bifidobacterium</i>   | Core                      | 0.6724137<br>9 | 20        | 13.5            | 177                 |
| <i>Flavobacterium</i>    | Low abundant              | 0.6610169<br>5 | 19        | 15.15789<br>474 | 7                   |
| <i>Morganella</i>        | Low abundant              | 0.6610169<br>5 | 19        | 15.15789<br>474 | 12                  |
| <i>Staphylococcus</i>    | Low abundant              | 0.6393442<br>6 | 18        | 14.44444<br>444 | 18                  |
| <i>Sphingomonas</i>      | Low abundant              | 0.6190476<br>2 | 17        | 17.17647<br>059 | 1                   |
| <i>Escherichia</i>       | Low abundant              | 0.6190476<br>2 | 17        | 17.17647<br>059 | 4                   |
| <i>Chryseobacterium</i>  | Low abundant              | 0.6190476<br>2 | 17        | 17.17647<br>059 | 6                   |
| <i>Psychrobacter</i>     | Low abundant              | 0.6190476<br>2 | 17        | 17.17647<br>059 | 4                   |
| <i>Achromobacter</i>     | Low abundant              | 0.6190476<br>2 | 17        | 17.17647<br>059 | 6                   |
| <i>Arthrobacter</i>      | Low abundant              | 0.6190476<br>2 | 17        | 17.17647<br>059 | 1                   |
| <i>Pseudoxanthomonas</i> | Low abundant              | 0.6190476<br>2 | 17        | 17.17647<br>059 | 29                  |
| <i>Ralstonia</i>         | Low abundant              | 0.6190476<br>2 | 18        | 14.05555<br>556 | 34                  |
| <i>Bradyrhizobium</i>    | Low abundant              | 0.609375       | 16        | 15.3125         | 42                  |
| <i>Pediococcus</i>       | Low abundant              | 0.609375       | 17        | 16              | 126                 |

|                           |              |                |    |                 |       |
|---------------------------|--------------|----------------|----|-----------------|-------|
| <i>Bartonella</i>         | Non-core     | 0.609375       | 14 | 11.14285<br>714 | 11207 |
| <i>Frischella</i>         | Non-core     | 0.609375       | 15 | 12.86666<br>667 | 25966 |
| <i>Pseudomonas</i>        | Low abundant | 0.6            | 14 | 14.64285<br>714 | 12    |
| <i>Commensalibacter</i>   | Non-core     | 0.5909090<br>9 | 14 | 15.64285<br>714 | 96    |
| <i>Acidocella</i>         | Low abundant | 0.5820895<br>5 | 12 | 12.91666<br>667 | 20    |
| <i>Lawsonella</i>         | Low abundant | 0.5735294<br>1 | 11 | 14.81818<br>182 | 1     |
| <i>Romboutsia</i>         | Low abundant | 0.5735294<br>1 | 11 | 14.81818<br>182 | 122   |
| <i>Moraxella</i>          | Low abundant | 0.5571428<br>6 | 11 | 13.45454<br>545 | 2     |
| <i>Pelomonas</i>          | Low abundant | 0.5571428<br>6 | 11 | 13.45454<br>545 | 1     |
| <i>Shinella</i>           | Low abundant | 0.5571428<br>6 | 9  | 13.11111<br>111 | 7     |
| <i>Prevotella</i>         | Low abundant | 0.5571428<br>6 | 11 | 13.45454<br>545 | 2     |
| <i>Anaerobiospirillum</i> | Low abundant | 0.5492957<br>7 | 10 | 13.8            | 9     |
| <i>Parasaccharibacter</i> | Non-core     | 0.5492957<br>7 | 11 | 13.54545<br>455 | 502   |
| Unassigned                | unassigned   | 0.5416666<br>7 | 13 | 13.84615<br>385 | 14462 |
| <i>Delftia</i>            | Low abundant | 0.5416666<br>7 | 7  | 9.571428<br>57  | 12    |
| <i>Lachnoclostridium</i>  | Low abundant | 0.5342465<br>8 | 8  | 15.375          | 13    |
| <i>Snodgrassella</i>      | Core         | 0.5270270<br>3 | 9  | 12.66666<br>667 | 21301 |

|                       |              |                |   |                 |       |
|-----------------------|--------------|----------------|---|-----------------|-------|
| <i>Gilliamella</i>    | Core         | 0.52           | 8 | 11.125          | 2408  |
| <i>Gemmiger</i>       | Low abundant | 0.5131578<br>9 | 6 | 10.16666<br>667 | 1     |
| <i>Streptococcus</i>  | Low abundant | 0.5131578<br>9 | 9 | 13.44444<br>444 | 9     |
| <i>Brevundimonas</i>  | Low abundant | 0.5064935<br>1 | 5 | 10.6            | 9     |
| <i>Lysinibacillus</i> | Low abundant | 0.4936708<br>9 | 5 | 15.6            | 16    |
| <i>Bacillus</i>       | Low abundant | 0.4875         | 5 | 9.4             | 196   |
| <i>Lactobacillus</i>  | Core         | 0.4642857<br>1 | 6 | 8.166666<br>67  | 44837 |
| <i>Thiohalobacter</i> | Low abundant | 0.4239130<br>4 | 3 | 10              | 1     |

**Table S25 : Network metrics for gut microbiome taxa in ileum exposed to 10 ppb clothianidin**

CC = Closeness centrality, DG = Degree, NC = Neighborhood Connectivity

| <b>Taxa name (spp.)</b> | <b>ASV Classification</b> | <b>CC</b>      | <b>DG</b> | <b>NC</b>      | <b>ASV activity</b> |
|-------------------------|---------------------------|----------------|-----------|----------------|---------------------|
| <i>Frischella</i>       | Non-core                  | 0.58           | 11        | 6.72727<br>273 | 16636               |
| <i>Blautia</i>          | Low abundant              | 0.5686274<br>5 | 9         | 6.33333<br>333 | 1                   |
| <i>Lactobacillus</i>    | Core                      | 0.5471698<br>1 | 7         | 7.71428<br>571 | 61901               |
| <i>Pediococcus</i>      | Low abundant              | 0.5370370<br>4 | 10        | 7              | 356                 |
| <i>Bombella</i>         | Non-core                  | 0.5370370<br>4 | 7         | 6.28571<br>429 | 1                   |
| <i>Snodgrassella</i>    | Core                      | 0.5370370<br>4 | 7         | 7.85714<br>286 | 20535               |

|                         |              |                |   |                |       |
|-------------------------|--------------|----------------|---|----------------|-------|
| <i>Commensalibacter</i> | Non-core     | 0.5272727<br>3 | 6 | 7.16666<br>667 | 115   |
| <i>Gilliamella</i>      | Core         | 0.5272727<br>3 | 7 | 6.85714<br>286 | 16658 |
| <i>Bifidobacterium</i>  | Core         | 0.5178571<br>4 | 8 | 6.25           | 474   |
| Unassigned              | unassigned   | 0.5178571<br>4 | 8 | 6.125          | 24882 |
| <i>Thiohalobacter</i>   | Low abundant | 0.5087719<br>3 | 6 | 6.66666<br>667 | 1     |
| <i>Acidocella</i>       | Low abundant | 0.5            | 5 | 7.6            | 31    |
| <i>Rothia</i>           | Low abundant | 0.4915254<br>2 | 8 | 8.625          | 3     |
| <i>Escherichia</i>      | Low abundant | 0.4915254<br>2 | 8 | 8.625          | 1     |
| <i>Skermanella</i>      | Low abundant | 0.4915254<br>2 | 8 | 8.625          | 20    |
| <i>Bradyrhizobium</i>   | Low abundant | 0.4915254<br>2 | 8 | 8.625          | 1     |
| <i>Pseudomonas</i>      | Low abundant | 0.4915254<br>2 | 8 | 8.625          | 1     |
| <i>Pelomonas</i>        | Low abundant | 0.4833333<br>3 | 6 | 7.16666<br>667 | 10    |
| <i>Staphylococcus</i>   | Low abundant | 0.4754098<br>4 | 8 | 7.875          | 4     |
| <i>Methylobacterium</i> | Low abundant | 0.4754098<br>4 | 8 | 7.875          | 3     |
| <i>Ralstonia</i>        | Low abundant | 0.4754098<br>4 | 7 | 6.14285<br>714 | 11    |
| <i>Roseburia</i>        | Low abundant | 0.4393939<br>4 | 4 | 6              | 2     |
| <i>Bartonella</i>       | Non-core     | 0.4393939<br>4 | 4 | 7.25           | 14459 |

|                           |              |                |   |                |    |
|---------------------------|--------------|----------------|---|----------------|----|
| <i>Bacillus</i>           | Low abundant | 0.4328358<br>2 | 3 | 6              | 86 |
| <i>Flavobacterium</i>     | Low abundant | 0.4264705<br>9 | 4 | 6.25           | 2  |
| <i>Anaerobiospirillum</i> | Low abundant | 0.4264705<br>9 | 4 | 6              | 32 |
| <i>Lachnoclostridium</i>  | Low abundant | 0.4142857<br>1 | 3 | 6              | 20 |
| <i>Parasaccharibacter</i> | Non-core     | 0.4142857<br>1 | 4 | 5              | 75 |
| <i>Shinella</i>           | Low abundant | 0.4027777<br>8 | 3 | 6              | 20 |
| <i>Streptococcus</i>      | Low abundant | 0.3918918<br>9 | 3 | 5.66666<br>667 | 5  |

**Table S26 : Network metrics for gut microbiome taxa in rectum exposed to 0 ppb clothianidin**

CC = Closeness centrality, DG = Degree, NC = Neighborhood Connectivity

| Taxa name (spp.)             | ASV Classification | CC   | DG | NC              | ASV activity |
|------------------------------|--------------------|------|----|-----------------|--------------|
| <i>Dialister</i>             | Low abundant       | 0.75 | 22 | 19.772727<br>27 | 2            |
| <i>Morganella</i>            | Low abundant       | 0.75 | 22 | 19.772727<br>27 | 1            |
| <i>Gemmiger</i>              | Low abundant       | 0.75 | 22 | 19.772727<br>27 | 10           |
| <i>Phascolarctobacterium</i> | Low abundant       | 0.75 | 22 | 19.772727<br>27 | 4            |
| <i>Staphylococcus</i>        | Low abundant       | 0.75 | 22 | 19.772727<br>27 | 1            |
| <i>Faecalibacterium</i>      | Low abundant       | 0.75 | 22 | 19.772727<br>27 | 21           |

|                          |              |                |    |                 |       |
|--------------------------|--------------|----------------|----|-----------------|-------|
| <i>Blautia</i>           | Low abundant | 0.75           | 22 | 19.772727<br>27 | 11    |
| <i>Bacteroides</i>       | Low abundant | 0.75           | 22 | 19.772727<br>27 | 32    |
| <i>Streptococcus</i>     | Low abundant | 0.75           | 22 | 19.772727<br>27 | 3     |
| <i>Brevundimonas</i>     | Low abundant | 0.75           | 22 | 19.772727<br>27 | 1     |
| <i>Ralstonia</i>         | Low abundant | 0.75           | 22 | 19.772727<br>27 | 1     |
| <i>Acidocella</i>        | Low abundant | 0.7333333<br>3 | 21 | 17.238095<br>24 | 48    |
| <i>Roseburia</i>         | Low abundant | 0.7021276<br>6 | 20 | 19.1            | 33    |
| <i>Prevotella</i>        | Low abundant | 0.6875         | 19 | 18.526315<br>79 | 3     |
| Unassigned               | unassigned   | 0.6734693<br>9 | 19 | 18.684210<br>53 | 26229 |
| <i>Bartonella</i>        | Non-core     | 0.6734693<br>9 | 18 | 17.388888<br>89 | 19028 |
| <i>Bifidobacterium</i>   | Core         | 0.66           | 18 | 17.611111<br>11 | 199   |
| <i>Delftia</i>           | Low abundant | 0.6470588<br>2 | 17 | 19.588235<br>29 | 3     |
| <i>Snodgrassella</i>     | Core         | 0.6470588<br>2 | 16 | 19.75           | 9248  |
| <i>Escherichia</i>       | Low abundant | 0.6346153<br>8 | 17 | 19.647058<br>82 | 7     |
| <i>Commensalibacter</i>  | Non-core     | 0.6346153<br>8 | 18 | 18.722222<br>22 | 59    |
| <i>Lachnoclostridium</i> | Low abundant | 0.6346153<br>8 | 17 | 18.529411<br>76 | 81    |
| <i>Lactobacillus</i>     | Core         | 0.6111111<br>1 | 15 | 18.466666<br>67 | 65178 |

|                           |              |                |   |                 |       |
|---------------------------|--------------|----------------|---|-----------------|-------|
| <i>Pediococcus</i>        | Low abundant | 0.55           | 7 | 9               | 23    |
| <i>Anaerobiospirillum</i> | Low abundant | 0.5409836<br>1 | 6 | 16.166666<br>67 | 12    |
| <i>Shinella</i>           | Low abundant | 0.5322580<br>6 | 7 | 17.285714<br>29 | 17    |
| <i>Bradyrhizobium</i>     | Low abundant | 0.515625       | 6 | 10.166666<br>67 | 3     |
| <i>Bombella</i>           | Non-core     | 0.515625       | 6 | 10.166666<br>67 | 2121  |
| <i>Gilliamella</i>        | Core         | 0.5076923<br>1 | 5 | 13.4            | 9502  |
| <i>Flavobacterium</i>     | Low abundant | 0.4852941<br>2 | 4 | 18.75           | 7     |
| <i>Frischella</i>         | Non-core     | 0.4782608<br>7 | 3 | 14.333333<br>33 | 12408 |
| <i>Pelomonas</i>          | Low abundant | 0.4647887<br>3 | 4 | 13.75           | 1     |
| <i>Acinetobacter</i>      | Low abundant | 0.4647887<br>3 | 4 | 13.75           | 2     |
| <i>Parasaccharibacter</i> | Non-core     | 0.44           | 3 | 9.3333333<br>3  | 28    |



**Table S27 : Network metrics for gut microbiome taxa in rectum exposed to 0.1 ppb clothianidin**

CC = Closeness centrality, DG = Degree, NC = Neighborhood Connectivity

| <b>Taxa name (spp.)</b> | <b>ASV Classification</b> | <b>CC</b>      | <b>DG</b> | <b>NC</b>      | <b>ASV activity</b> |
|-------------------------|---------------------------|----------------|-----------|----------------|---------------------|
| <i>Bifidobacterium</i>  | Core                      | 0.5853658<br>5 | 11        | 6.818181<br>82 | 544                 |
| <i>Bacillus</i>         | Low abundant              | 0.5714285<br>7 | 9         | 6.777777<br>78 | 20                  |
| <i>Pseudaminobacter</i> | Non-core                  | 0.5581395<br>3 | 7         | 7.142857<br>14 | 1                   |
| <i>Lysinibacillus</i>   | Low abundant              | 0.5581395<br>3 | 7         | 7.142857<br>14 | 4                   |
| <i>Frischella</i>       | Non-core                  | 0.5581395<br>3 | 8         | 5              | 10075               |
| <i>Lactobacillus</i>    | Core                      | 0.5106383      | 8         | 6.375          | 65373               |
| <i>Staphylococcus</i>   | Low abundant              | 0.5            | 5         | 7.6            | 1                   |
| Unassigned              | unassigned                | 0.5            | 8         | 6.125          | 30672               |
| <i>Acidocella</i>       | Low abundant              | 0.48           | 6         | 7              | 50                  |
| <i>Bartonella</i>       | Non-core                  | 0.4705882<br>4 | 7         | 6              | 14746               |
| <i>Actinomyces</i>      | Low abundant              | 0.4615384<br>6 | 7         | 8              | 2                   |
| <i>Leifsonia</i>        | Low abundant              | 0.4615384<br>6 | 7         | 8              | 1                   |
| <i>Streptococcus</i>    | Low abundant              | 0.4615384<br>6 | 7         | 8              | 3                   |
| <i>Bradyrhizobium</i>   | Low abundant              | 0.4615384<br>6 | 7         | 8              | 2                   |
| <i>Brevundimonas</i>    | Low abundant              | 0.4615384<br>6 | 7         | 8              | 2                   |

|                           |              |                |   |                |       |
|---------------------------|--------------|----------------|---|----------------|-------|
| <i>Lachnospirillum</i>    | Low abundant | 0.4615384<br>6 | 3 | 6.666666<br>67 | 38    |
| <i>Snodgrassella</i>      | Core         | 0.4615384<br>6 | 8 | 6.875          | 13233 |
| <i>Shinella</i>           | Low abundant | 0.4528301<br>9 | 4 | 7.5            | 24    |
| <i>Bacteroides</i>        | Low abundant | 0.4285714<br>3 | 3 | 6              | 1     |
| <i>Commensalibacter</i>   | Non-core     | 0.4210526<br>3 | 4 | 6.5            | 107   |
| <i>Pediococcus</i>        | Low abundant | 0.4            | 2 | 8              | 5     |
| <i>Gilliamella</i>        | Core         | 0.3870967<br>7 | 3 | 5.333333<br>33 | 8282  |
| <i>Delftia</i>            | Low abundant | 0.3692307<br>7 | 2 | 5              | 2     |
| <i>Bombella</i>           | Non-core     | 0.3692307<br>7 | 2 | 5              | 14    |
| <i>Anaerobiospirillum</i> | Low abundant | 0.3529411<br>8 | 2 | 3.5            | 20    |

**Table S28 : Network metrics for gut microbiome taxa in rectum exposed to 1 ppb clothianidin**

CC = Closeness centrality, DG = Degree, NC = Neighborhood Connectivity

| Taxa name (spp.)        | ASV<br>Classification | CC             | DG | NC             | ASV<br>activity |
|-------------------------|-----------------------|----------------|----|----------------|-----------------|
| <i>Lactobacillus</i>    | Core                  | 0.6470588<br>2 | 11 | 6.90909<br>091 | 63263           |
| <i>Commensalibacter</i> | Non-core              | 0.6285714<br>3 | 10 | 7.9            | 167             |
| <i>Lachnospirillum</i>  | Low<br>abundant       | 0.6111111<br>1 | 8  | 7.375          | 79              |

|                           |              |                |    |                |       |
|---------------------------|--------------|----------------|----|----------------|-------|
| Unassigned                | unassigned   | 0.6111111<br>1 | 8  | 9              | 33295 |
| <i>Bartonella</i>         | Non-core     | 0.6111111<br>1 | 9  | 7              | 13115 |
| <i>Snodgrassella</i>      | Core         | 0.6111111<br>1 | 10 | 7.3            | 13936 |
| <i>Anaerobiospirillum</i> | Low abundant | 0.5945945<br>9 | 8  | 6.875          | 23    |
| <i>Acidocella</i>         | Low abundant | 0.5945945<br>9 | 8  | 6.75           | 51    |
| <i>Escherichia</i>        | Low abundant | 0.5641025<br>6 | 6  | 7.5            | 1     |
| <i>Oceanobacillus</i>     | Low abundant | 0.5641025<br>6 | 6  | 7.5            | 1     |
| <i>Bifidobacterium</i>    | Core         | 0.55           | 8  | 7              | 239   |
| <i>Parasaccharibacter</i> | Non-core     | 0.5365853<br>7 | 5  | 8              | 5     |
| <i>Pseudaminobacter</i>   | Low abundant | 0.5238095<br>2 | 6  | 7.66666<br>667 | 1     |
| <i>Morganella</i>         | Low abundant | 0.5238095<br>2 | 6  | 7.66666<br>667 | 1     |
| <i>Shinella</i>           | Low abundant | 0.5238095<br>2 | 5  | 5.4            | 31    |
| <i>Bacteroides</i>        | Low abundant | 0.5116279<br>1 | 5  | 7              | 2     |
| <i>Gilliamella</i>        | Core         | 0.5116279<br>1 | 6  | 6.5            | 3188  |
| <i>Lysinibacillus</i>     | Low abundant | 0.5            | 5  | 6              | 15    |
| <i>Frischella</i>         | Non-core     | 0.4888888<br>9 | 5  | 7.6            | 11109 |
| <i>Blautia</i>            | Low abundant | 0.4782608<br>7 | 3  | 9              | 1     |

|                       |              |                |   |      |    |
|-----------------------|--------------|----------------|---|------|----|
| <i>Flavobacterium</i> | Low abundant | 0.4583333<br>3 | 4 | 6.25 | 2  |
| <i>Delftia</i>        | Low abundant | 0.4583333<br>3 | 4 | 6.25 | 1  |
| <i>Pediococcus</i>    | Low abundant | 0.4150943<br>4 | 2 | 8.5  | 11 |

**Table S29 : Network metrics for gut microbiome taxa in rectum exposed to 10 ppb clothianidin**

CC = Closeness centrality, DG = Degree, NC = Neighborhood Connectivity

| Taxa name (spp.)        | ASV Classification | CC             | DG | NC         | ASV activity |
|-------------------------|--------------------|----------------|----|------------|--------------|
| <i>Snodgrassella</i>    | Core               | 0.6774193<br>5 | 12 | 7.66666667 | 7242         |
| <i>Bifidobacterium</i>  | Core               | 0.65625        | 11 | 8.54545455 | 642          |
| <i>Frischella</i>       | Non-core           | 0.65625        | 11 | 7.36363636 | 6984         |
| <i>Commensalibacter</i> | Non-core           | 0.6176470<br>6 | 9  | 8.88888889 | 87           |
| <i>Bradyrhizobium</i>   | Low abundant       | 0.6176470<br>6 | 8  | 8.75       | 1            |
| Unassigned              | unassigned         | 0.6176470<br>6 | 9  | 8.44444444 | 26387        |
| <i>Acidocella</i>       | Low abundant       | 0.6            | 10 | 7.3        | 43           |
| <i>Shinella</i>         | Low abundant       | 0.5675675<br>7 | 7  | 9          | 15           |
| <i>Psychrobacter</i>    | Low abundant       | 0.5675675<br>7 | 6  | 7.5        | 1            |
| <i>Staphylococcus</i>   | Low abundant       | 0.5526315<br>8 | 7  | 9.71428571 | 1            |

|                           |              |                |   |            |       |
|---------------------------|--------------|----------------|---|------------|-------|
| <i>Faecalibacterium</i>   | Low abundant | 0.5526315<br>8 | 7 | 9.71428571 | 1     |
| <i>Pediococcus</i>        | Low abundant | 0.5526315<br>8 | 8 | 7.5        | 7     |
| <i>Bacillus</i>           | Low abundant | 0.5526315<br>8 | 5 | 7.2        | 1     |
| <i>Lachnoclostridium</i>  | Low abundant | 0.5384615<br>4 | 7 | 6.42857143 | 59    |
| <i>Anaerobiospirillum</i> | Low abundant | 0.525          | 6 | 5.16666667 | 18    |
| <i>Bartonella</i>         | Non-core     | 0.525          | 5 | 7.6        | 11244 |
| <i>Gilliamella</i>        | Core         | 0.5121951<br>2 | 6 | 5.83333333 | 12959 |
| <i>Pseudaminobacter</i>   | Low abundant | 0.5            | 5 | 9.2        | 1     |
| <i>Streptococcus</i>      | Low abundant | 0.5            | 5 | 9.2        | 2     |
| <i>Lactobacillus</i>      | Core         | 0.4772727<br>3 | 3 | 7.33333333 | 58212 |
| <i>Parasaccharibacter</i> | Non-core     | 0.4468085<br>1 | 2 | 7          | 50    |
| <i>Flavobacterium</i>     | Low abundant | 0.4117647<br>1 | 3 | 6.33333333 | 1     |

**Table S30 : Number of positive (+) and/or negative (-) interactions at the genus level in the microbial network depending on each honeybee gut section (midgut, ileum and rectum) and clothianidin concentrations (Ctrl (0 ppb), 0.1, 1 and 10 ppb)**

| <b>Clothianidin Concentration</b> | <b>(+)</b>    |              |               | <b>(-)</b>    |              |               |
|-----------------------------------|---------------|--------------|---------------|---------------|--------------|---------------|
|                                   | <b>Midgut</b> | <b>Ileum</b> | <b>Rectum</b> | <b>Midgut</b> | <b>Ileum</b> | <b>Rectum</b> |
| <b>Control (0 ppb)</b>            | 96            | 27           | 108           | 1             | 6            | 5             |
| <b>0.1 ppb</b>                    | 28            | 52           | 21            | 5             | 5            | 1             |
| <b>1 ppb</b>                      | 30            | 73           | 13            | 5             | 4            | 0             |
| <b>10 ppb</b>                     | 40            | 29           | 17            | 4             | 2            | 3             |

**Figure S1 : Violin plot of Degree from taxa in midgut microbial networks**

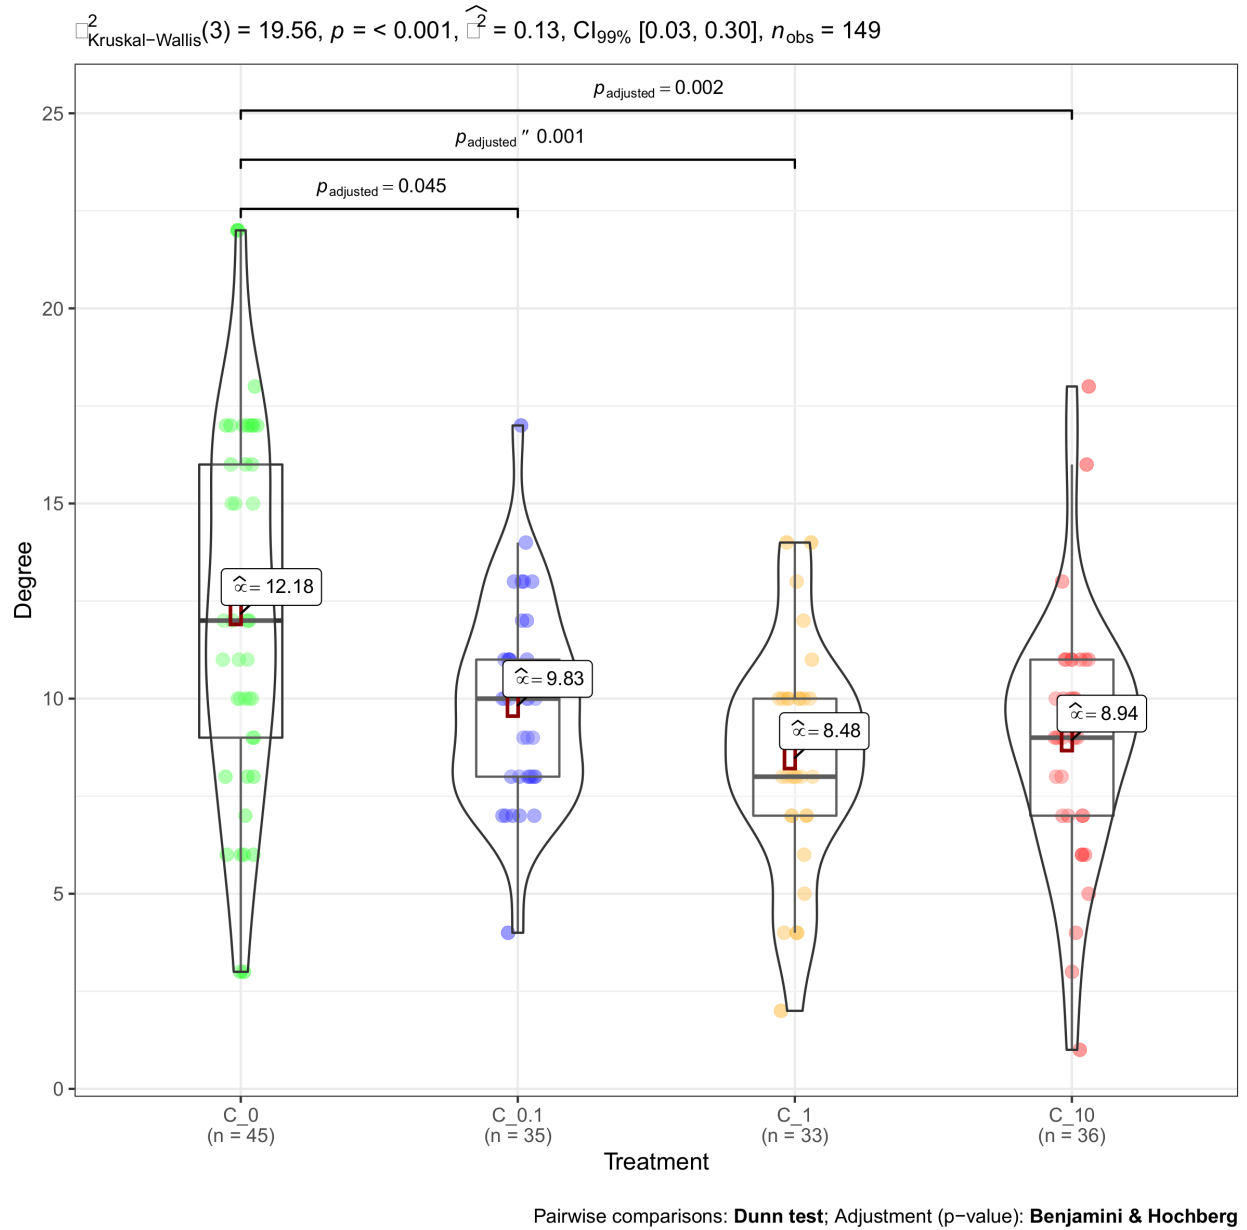

**Figure S2 : Violin plot of Closeness Centrality from taxa in midgut microbial networks**

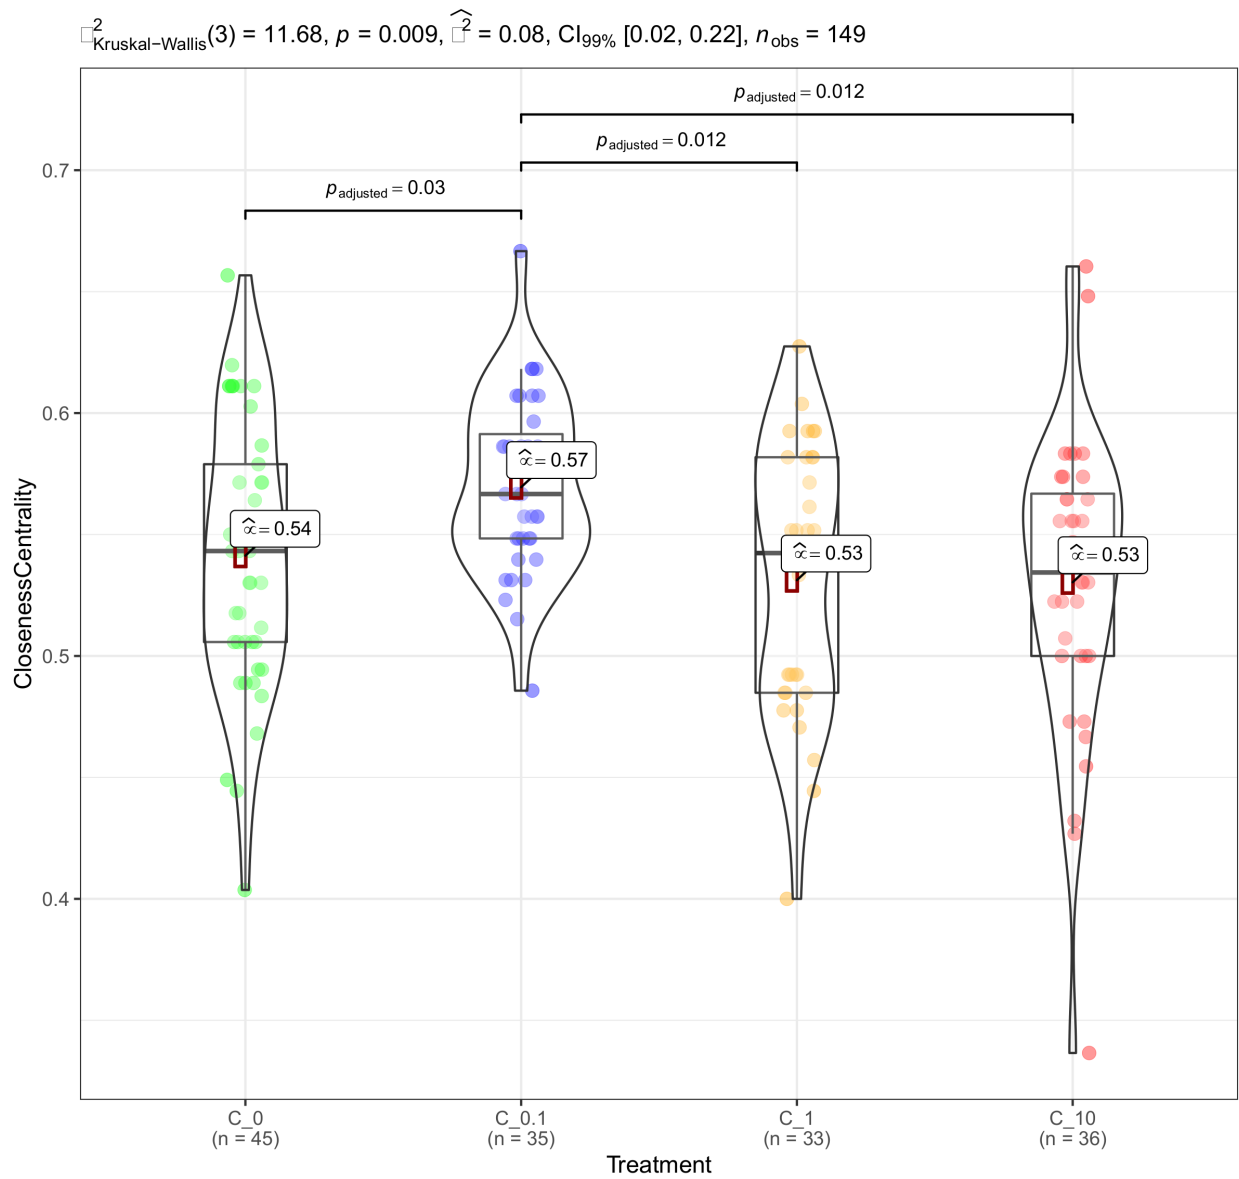

Pairwise comparisons: **Dunn test**; Adjustment (p-value): **Benjamini & Hochberg**



**Figure S3 : Violin plot of Neighborhood Connectivity from taxa in midgut microbial networks**

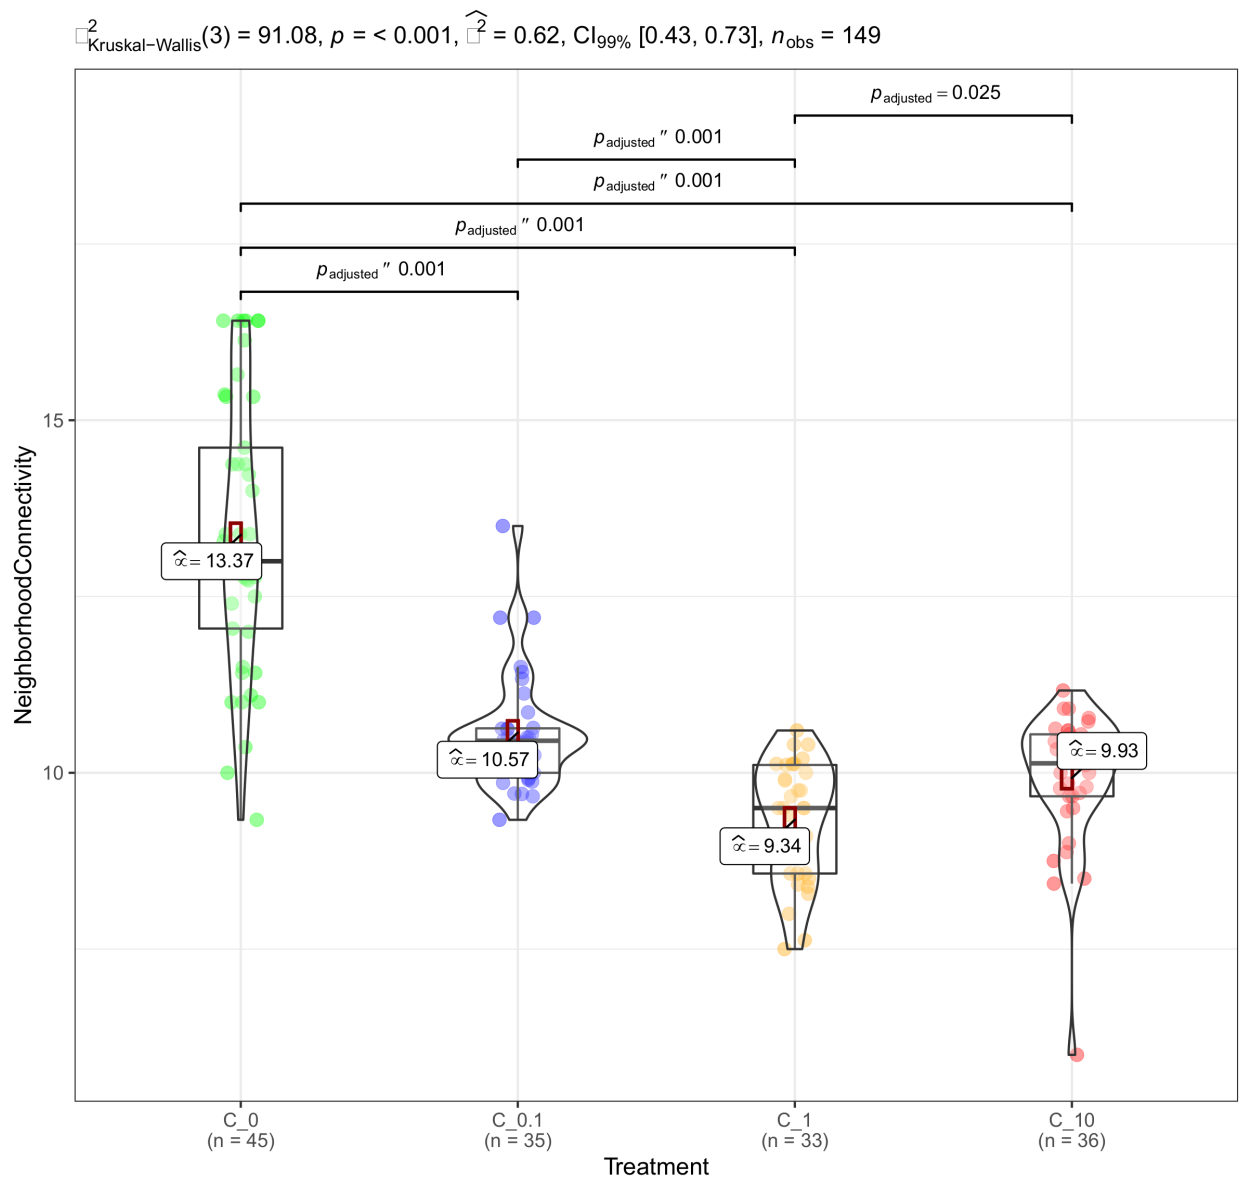

Pairwise comparisons: **Dunn test**; Adjustment (p-value): **Benjamini & Hochberg**

Figure S4 : Violin plot of Degree from taxa in ileum microbial networks

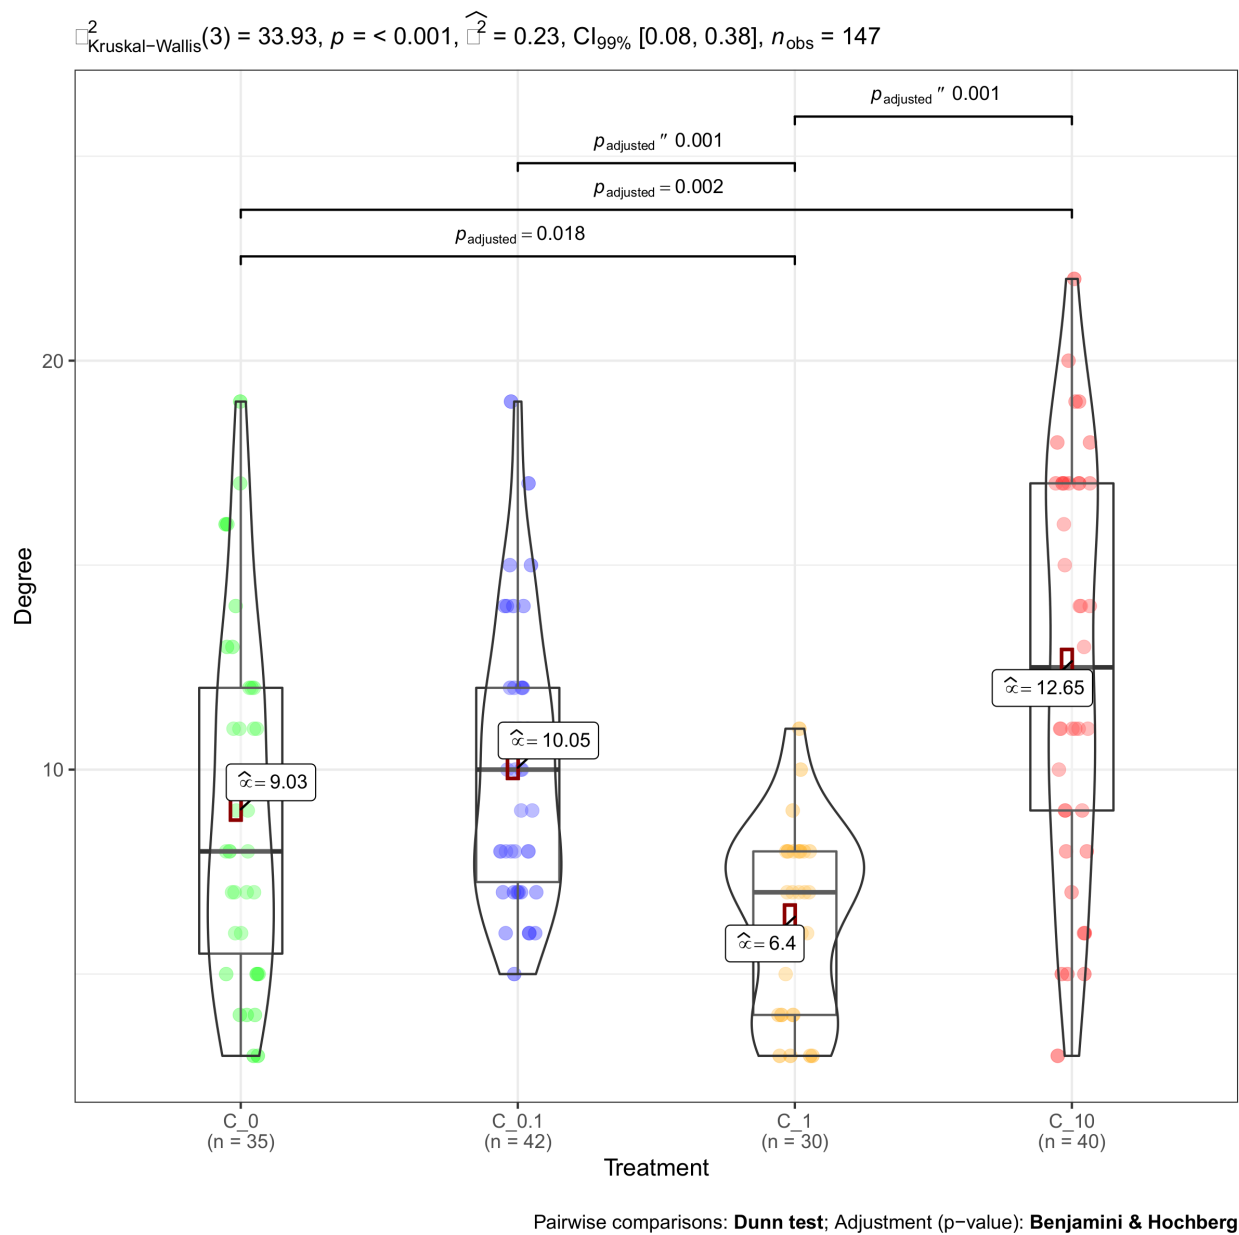

Figure S5 : Violin plot of Closeness Centrality from taxa in ileum microbial networks

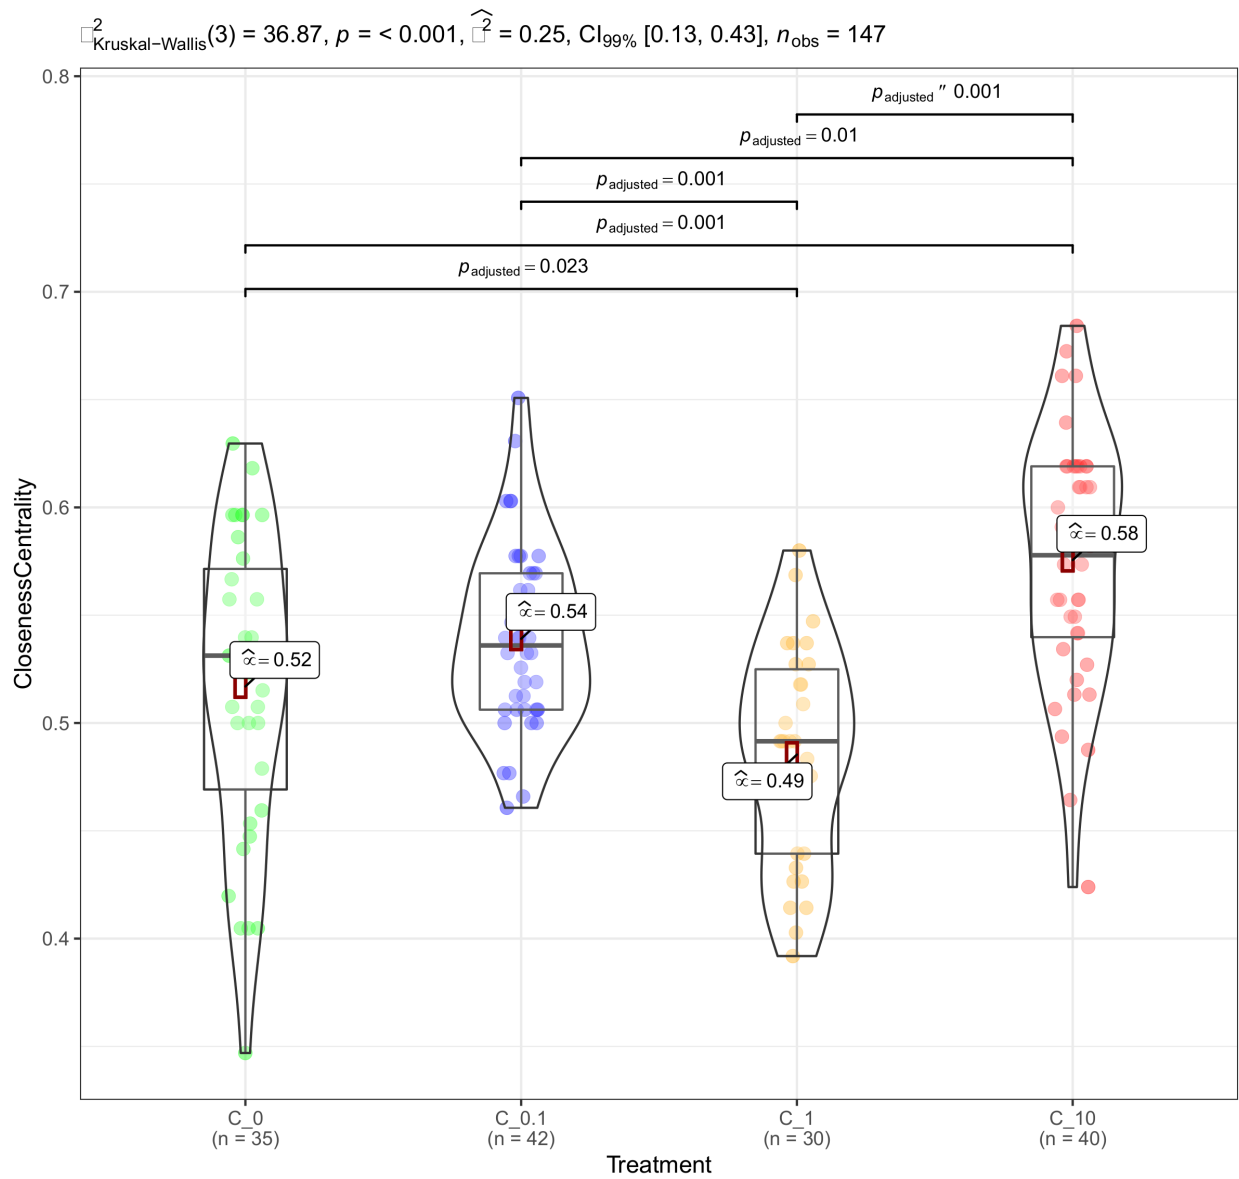

Pairwise comparisons: **Dunn test**; Adjustment (p-value): **Benjamini & Hochberg**

Figure S6 : Violin plot of Neighborhood Connectivity from taxa in ileum microbial networks

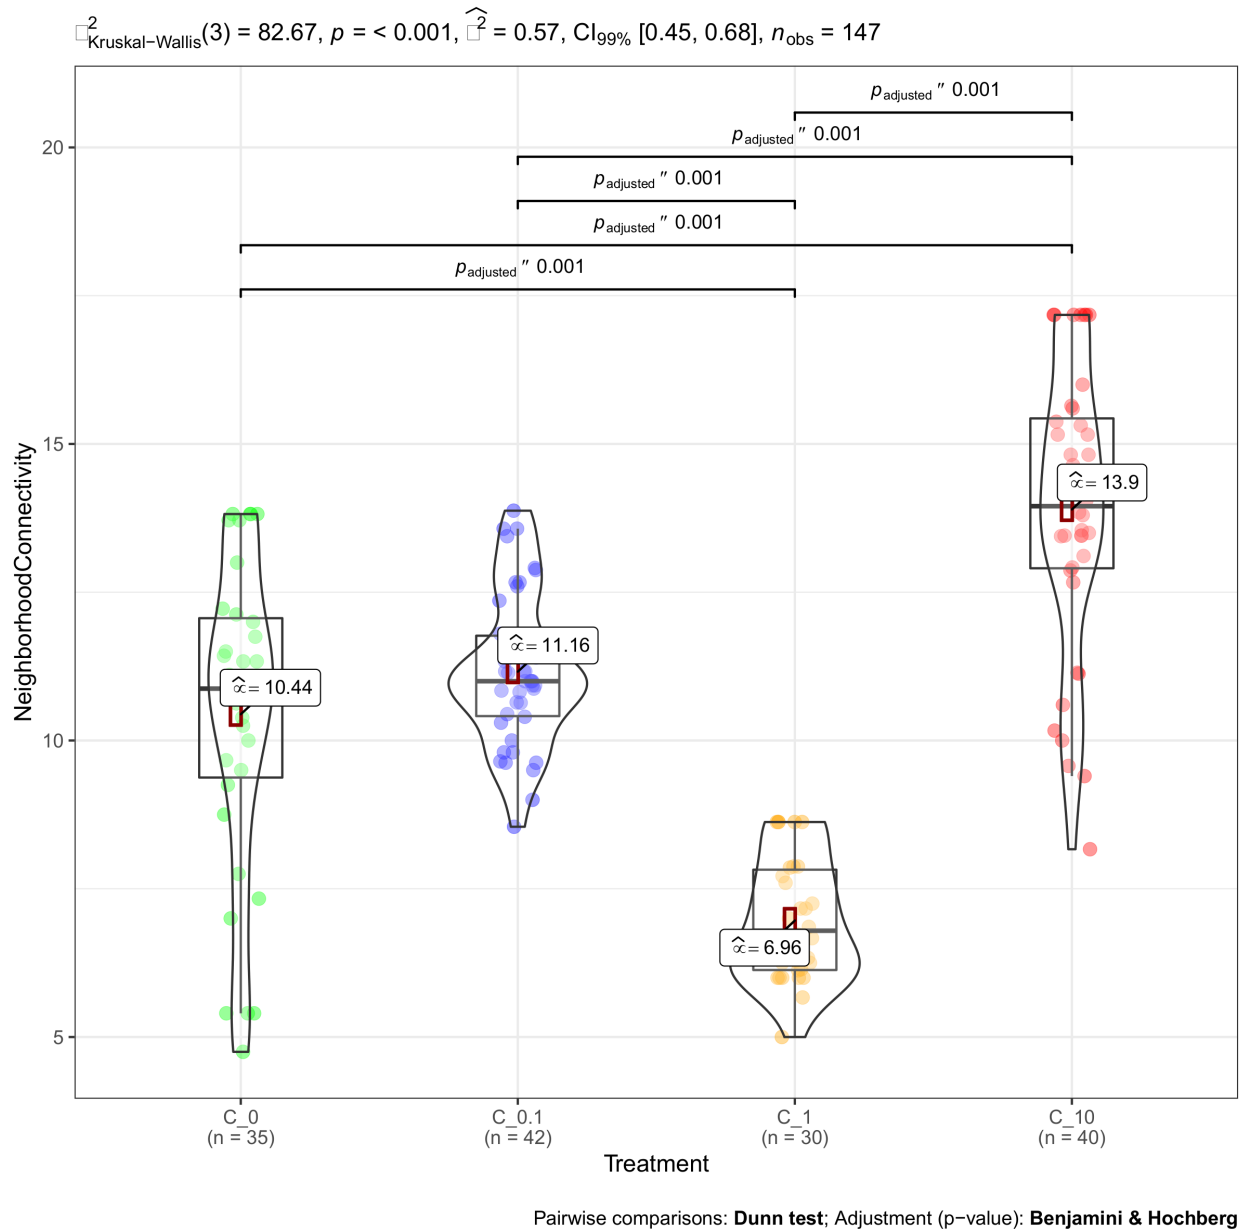

Figure S7 : Violin plot of Degree from taxa in rectum microbial networks

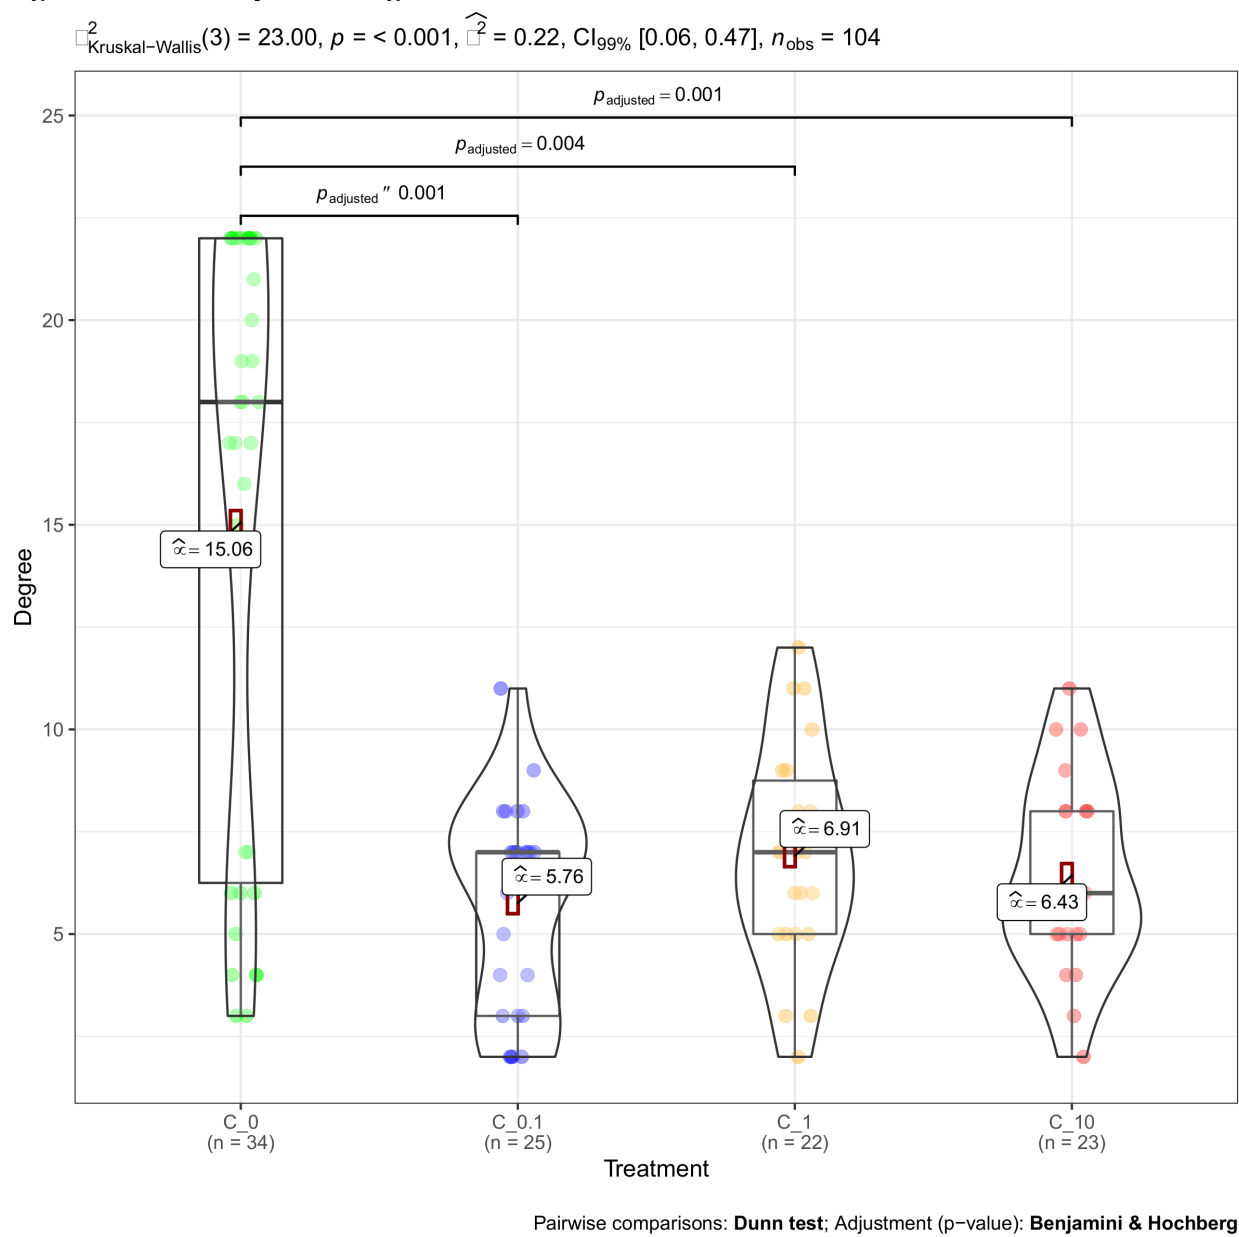

Figure S8 : Violin plot of Closeness Centrality from taxa in rectum microbial networks

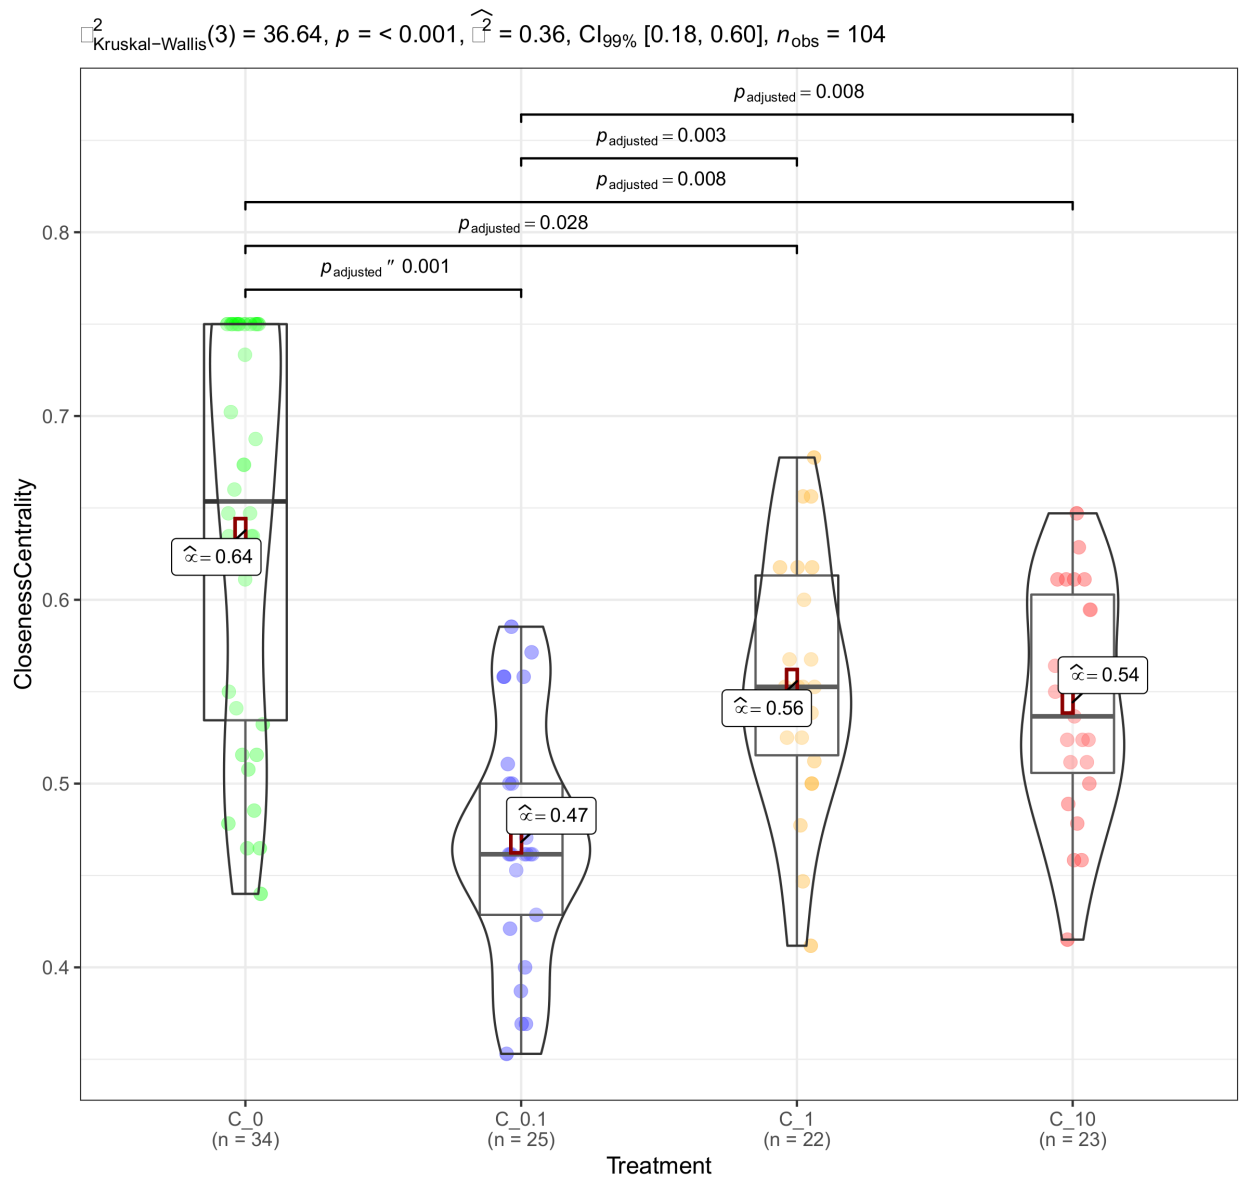

**Figure S9 : Violin plot of Neighborhood Connectivity from taxa in rectum microbial networks**

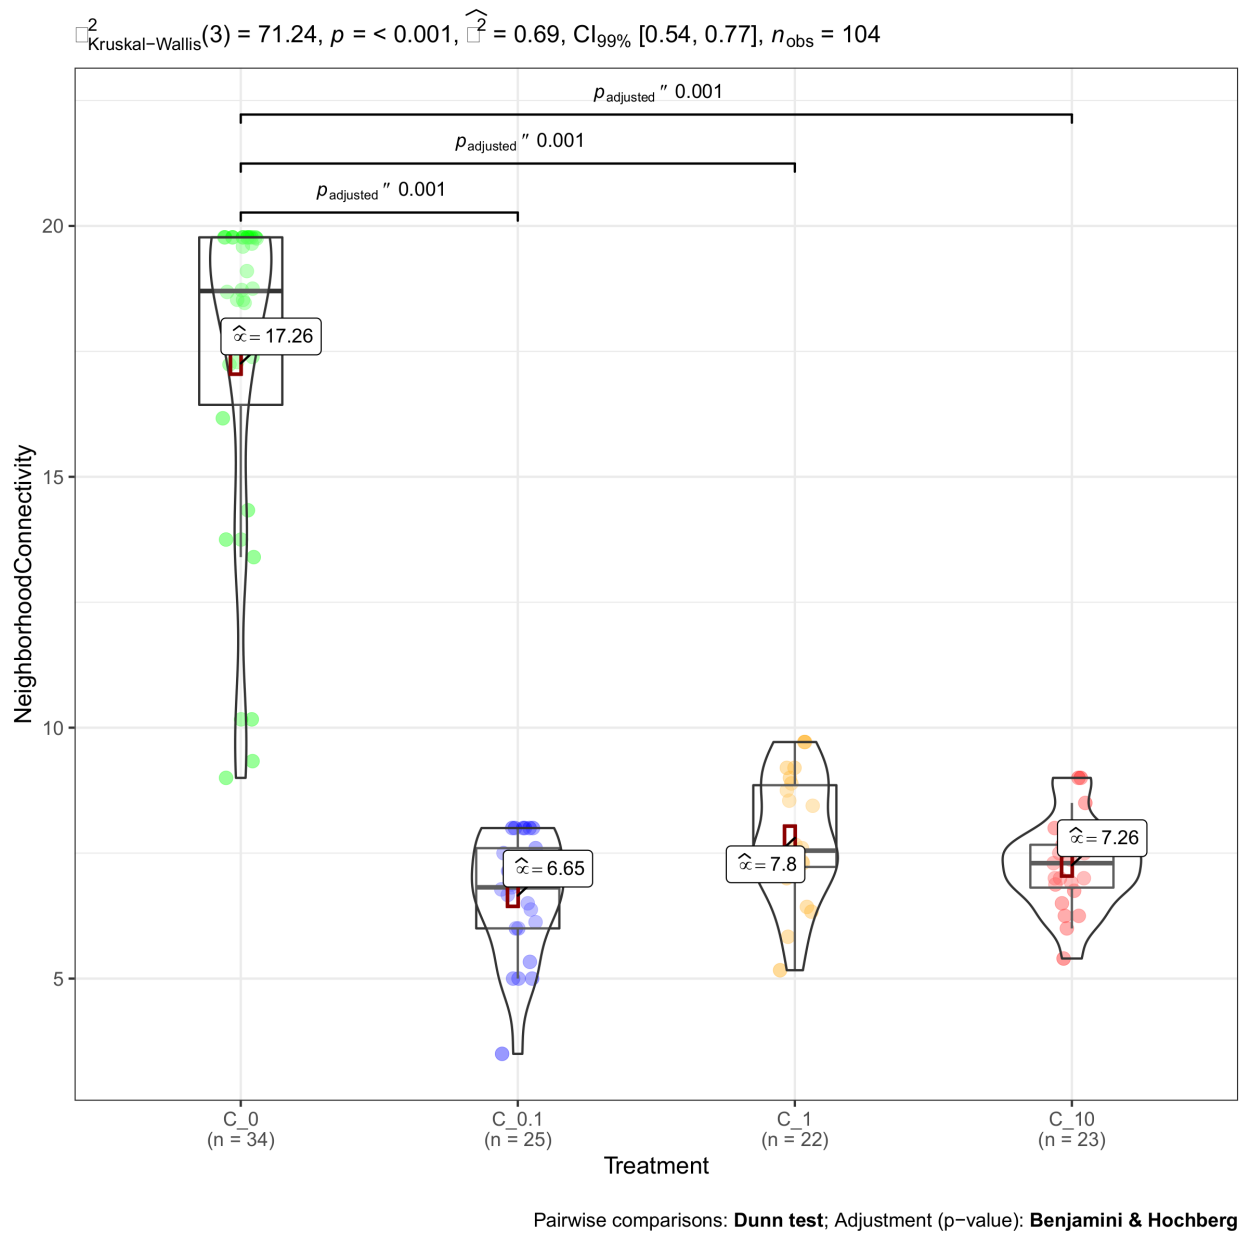

Supplement: s1 [file s1]
